# Supplementary material for: Gene structures and processing of Arabidopsis thaliana HYL1-dependent pri-miRNAs
Source: Oxford University Press journal article supplement (doi:10.1093/nar/gkp189), 2009-03-20
Supplement: gkp189_Supplementary_Data.zip [file gkp189_Supplementary_Data.zip]

Archive with 4 entries (4 files):
- nar-02598-c-2008-File010.xls
- nar-02598-c-2008-File007.doc
- nar-02598-c-2008-File009.pdf
- nar-02598-c-2008-File008.pdf
