# Supplementary material for: Gene structures and processing of Arabidopsis thaliana HYL1-dependent pri-miRNAs
Source: Oxford University Press journal article supplement (doi:10.1093/nar/gkp189), 2009-03-20
Supplement: gkp189_Supplementary_Data.zip [file gkp189_Supplementary_Data.zip › nar-02598-c-2008-File009.pdf]

**Table S1 Primers used in the experiments**

| No.                                              | Name     | Length (nt) | Sequence                                             |
|--------------------------------------------------|----------|-------------|------------------------------------------------------|
| <b>cDNA purity control &amp; standardization</b> |          |             |                                                      |
| 1.                                               | MAF5_F   | 20          | TTTTTTGCCCCCTTCGAATC                                 |
| 2.                                               | MAF5_R   | 22          | ATCTTCCGCCACCATTTGTAC                                |
| 3.                                               | ABH1_F   | 34          | CGGAATTCGATGGAATCTAAGACTTTGGATGGGC                   |
| 4.                                               | ABH1_R   | 37          | GGGGATCCCTTCTTCCGAGAGGTTTTTCTTCAGTTCG                |
| 5.                                               | UBQ10_F  | 27          | GGCCTTGTATAATCCCTGATGAATAAG                          |
| 6.                                               | UBQ10_R  | 28          | AAAGAGATAACAGGAACGGAAACATAGT                         |
| 7.                                               | ACT2_F   | 23          | GGTAACATTGTGCTCAGTGGTGG                              |
| 8.                                               | ACT2_R   | 22          | CTCGGCCTTGGAGATCCACATC                               |
| <b>pri-miRNA 3'RACE &amp; 5'RACE experiments</b> |          |             |                                                      |
| 9.                                               | QT       | 52          | CCAGTGAGCAGAGTGACGAGGACTCGAGCTCAAGC(T) <sub>17</sub> |
| 10.                                              | Q0       | 18          | CCAGTGAGCAGAGTGACG                                   |
| 11.                                              | Q1       | 18          | GAGGACTCGAGCTCAAGC                                   |
| 12.                                              | 3R156a_1 | 22          | GCCTGTCTTCGTTCTCTATGTC                               |
| 13.                                              | 3R156a_2 | 22          | AATCTCTCTCTATCACTTACAC                               |
| 14.                                              | 3R156c_1 | 21          | ATTTGCTTCTCTTGCCTGCTC                                |
| 15.                                              | 3R156c_2 | 20          | TGCGTGCTCACTGCTCTATC                                 |
| 16.                                              | 3R157c_1 | 20          | TCAAAGAAAGAGAGGGAGAG                                 |
| 17.                                              | 3R157c_2 | 21          | ACTTCTGTCACCACCTTTATC                                |
| 18.                                              | 3R158a_1 | 20          | ACCGTGATGATGTCGTGGAG                                 |
| 19.                                              | 3R158a_2 | 21          | CGTGGAGATTTTGTGAGATG                                 |
| 20.                                              | 3R159a_1 | 21          | GTTGAGCAGGGTAAAGAAAAG                                |
| 21.                                              | 3R159a_2 | 20          | CATATCTCAGGAGCTTTAAC                                 |
| 22.                                              | 3R160a_1 | 21          | CATATGCTGAGCCCATCGAGT                                |
| 23.                                              | 3R160a_2 | 21          | GACCTCCGTGGATGGCGTATG                                |
| 24.                                              | 3R160b_1 | 20          | GTATGCCACAAGAAAACATC                                 |
| 25.                                              | 3R160b_2 | 23          | TAGTGGCGTACAGAGTAGTCAAG                              |
| 26.                                              | 3R161_1  | 21          | GAAGCGGAAACAGTAATCAAC                                |
| 27.                                              | 3R161_2  | 20          | ACCCTGGTTTAGTCACTTTC                                 |
| 28.                                              | 3R164c_1 | 21          | CGTGCGAACACAAATGAAATC                                |
| 29.                                              | 3R164c_2 | 22          | CAATCGTCAATGGATAGAACAG                               |
| 30.                                              | 3R166a_1 | 20          | GCTCGCTCTATTCATGTTGG                                 |
| 31.                                              | 3R166a_2 | 22          | GAACCTTCAGATTTAGATTTG                                |
| 32.                                              | 3R166b_1 | 20          | TTGAGGGGACTGTTGTCTGG                                 |
| 33.                                              | 3R166b_2 | 23          | GATGATTGATTAGGGTTTTAGTG                              |
| 34.                                              | 3R167a_1 | 22          | GCTTTCTTTATCCTTTGTTGTG                               |
| 35.                                              | 3R167a_2 | 20          | ATCATGTTCGCAGTTTCACC                                 |
| 36.                                              | 3R169f_1 | 22          | CCATTGATTTGGTCTCATTAC                                |
| 37.                                              | 3R169f_2 | 21          | GCTCTGCTTCGTTCTCTATTC                                |
| 38.                                              | 3R171b_1 | 20          | GCGAGATATTAGTGCGGTTT                                 |
| 39.                                              | 3R171b_2 | 20          | GTTCAATCAAATAGTCGTCC                                 |
| 40.                                              | 3R171c_1 | 20          | CACTATCGGACATCAAATAC                                 |
| 41.                                              | 3R171c_2 | 20          | TCAATCAGAAAACCGTACTC                                 |
| 42.                                              | 3R172a_1 | 20          | TCTGTTGATGGACGGTGGTG                                 |
| 43.                                              | 3R172a_2 | 21          | CTCTCCACAAAGTTCTCTATG                                |
| 44.                                              | 3R172b_1 | 21          | TCATCTGTCGTTGTTGTAGG                                 |
| 45.                                              | 3R172b_2 | 21          | GACGGCTACAAATACCTAAAG                                |
| 46.                                              | 3R172e_1 | 22          | CAGCACCATTAAAGATTACAAAG                              |
| 47.                                              | 3R172e_2 | 20          | TCCCTTTGCTTTCGCCTCTC                                 |
| 48.                                              | 3R319b_1 | 20          | CGACTCATTCATCCAAATAC                                 |
| 49.                                              | 3R319b_2 | 22          | TATGGTAAATGAATGAATGATG                               |
| 50.                                              | 3R393a_1 | 21          | CTGGCTTTAAGATTCCGCAAC                                |
| 51.                                              | 3R393a_2 | 21          | GATTCCGCAACCTTGTATCTC                                |
| 52.                                              | 3R393a_3 | 20          | ACATTGCTCTCAACTTTTAG                                 |
| 53.                                              | 3R393a_4 | 25          | TGAGAGAGAGATAGAGAGTTGAACA                            |
| 54.                                              | 5R169f_0 | 21          | CAACAGATTGTGAATGAGACC                                |

|     |          |    |                                 |
|-----|----------|----|---------------------------------|
| 55. | 5R169f_1 | 21 | GTGAATGAGACCAAATCAATG           |
| 56. | 5R169f_2 | 21 | GACCTCTGATACAACCAAAG            |
| 57. | 5R158a_1 | 29 | TCTCAACAAAATCTCCACGACATCATCAC   |
| 58. | 5R158a_2 | 31 | GACAAAGAAGCACAGAGATGACGTGTTACTC |
| 59. | 5R164c_1 | 30 | TTTACATTCTGTTCTATCCATTGACGATTG  |
| 60. | 5R164c_2 | 31 | AACACGTGCGAAAATATGATCAACAAGTACC |
| 61. | 5R393a_1 | 31 | GAGATACAAGGTTGCGGAATCTTAAAGCCAG |
| 62. | 5R393a_2 | 29 | CCCTTTGGATCCTTCTCTAGTTGCTATG    |

#### **pri-miRNAs full-length RT-PCR amplification**

|      |           |    |                                     |
|------|-----------|----|-------------------------------------|
| 63.  | mi156aT_F | 26 | ATTGTTCACTCTCAAATCTCAAGTTC          |
| 64.  | mi156aT_R | 26 | AAGAGTAAAAGGGTAACATCACAAAC          |
| 65.  | mi156cT_F | 25 | ATATTTCTCTGCCTTTAGTTCTTTC           |
| 66.  | mi156cT_R | 24 | AACTATTGGTACTACGTCAATTCC            |
| 67.  | mi157cT_F | 21 | TAGGTTTGAGAGTGATGTTGG               |
| 68.  | mi157cT_R | 20 | CTCAGTGGATTGTCGTTGAA                |
| 69.  | mi158aT_F | 28 | GCTTTACTTTAGATTCTTCTAGGGTTTC        |
| 70.  | mi158aT_R | 28 | TGTTAAGTTTATCTCTTTGAAAGGTATC        |
| 71.  | mi159aT_F | 24 | TCTCTTTCTTCTCTCTAAGTATG             |
| 72.  | mi159aT_R | 26 | GATTTAGTTGTTAGATTAGATATGAG          |
| 73.  | mi160aT_F | 21 | CTCTCTCCATCACCTTCAATC               |
| 74.  | mi160aT_R | 34 | ACATAAATAAAAATATGTTTATATACAAAAGAATC |
| 75.  | mi160bT_F | 23 | CTCTGGTTCATGTTTTCCCTCA              |
| 76.  | mi160bT_R | 26 | TATGCTGTGCTATGGAGACAAAGTA           |
| 77.  | mi161T_F  | 26 | CCTTCTCTTCTATGAAAATTCCATTG          |
| 78.  | mi161T_R  | 25 | CAAAGGAACACTACTGCATGATTACAC         |
| 79.  | mi164cT_F | 24 | TCTTCCTCTCTACACACCCAAATC            |
| 80.  | mi164cT_R | 31 | AACTTCATGTCTCATATATACACCCTAATAC     |
| 81.  | mi166aT_F | 24 | TCACCACTCACTTATCTTCTTCTC            |
| 82.  | mi166aT_R | 25 | CTAAATATCTGGAATCTGGTTCATC           |
| 83.  | mi166bT_F | 23 | TTCTCTTCATCATCACCACATTC             |
| 84.  | mi166bT_R | 27 | CACTATGTAAATAAAGATCAGCTATAC         |
| 85.  | mi167aT_F | 24 | TGATCTGCTACGGTGAAGTCTATG            |
| 86.  | mi167aT_R | 26 | AGAAAGAGAAGTAAGCTCACAAAATC          |
| 87.  | mi169fT_F | 24 | CACACAACACAAGAGTCACGAAAG            |
| 88.  | mi169fT_R | 27 | TTCTTACATTGCTTGATATAGTTACC          |
| 89.  | mi171bT_F | 22 | CTAATTCGTACTTTGGTTTCTG              |
| 90.  | mi171bT_R | 21 | AGACTTCCTCGTTTTTCGTTAG              |
| 91.  | mi171cT_F | 20 | TAGCTCATGTTGTCTCTTTC                |
| 92.  | mi171cT_R | 23 | AATTAAAAGTTCAGAATATACAC             |
| 93.  | mi172aT_F | 22 | CGTTTTACTATTTTAGCAGTAT              |
| 94.  | mi172aT_R | 20 | AAAAGAGAGAACAATAAGCG                |
| 95.  | mi172bT_F | 20 | CACCTCTCACTCCCTTCTC                 |
| 96.  | mi172bT_R | 21 | CACACCGTAATGTTTGATTTG               |
| 97.  | mi172eT_F | 22 | GTGGGCTTGTGTTATATAGATG              |
| 98.  | mi172eT_R | 23 | ATAGAAACACCATAAACTTACAG             |
| 99.  | mi319bT_F | 21 | TCTCTTCTTCTCTCATCTCTC               |
| 100. | mi319bT_R | 24 | CGAAAGCTAGATATTTAATCTTAC            |
| 101. | mi393aT_F | 27 | AACCACATTGCTCTCAACTTTTAGAGT         |
| 102. | mi393aT_R | 25 | GACGTCTTTCATAAAATATATAAAT           |

#### **pri-miRNAs 3'end heterogeneity analysis**

|      |             |    |                                       |
|------|-------------|----|---------------------------------------|
| 103. | mi158a_6R1  | 26 | AAAAAAAAAAAAAAAAAAAAAAAAAGAA          |
| 104. | mi158a_11R1 | 26 | AAAAAAAAAAAAAAAAAAAAAAAAATCAG         |
| 105. | mi158a_6R2  | 26 | AAAAAAAAAAAAAAAAAAAAAAAAATAGAAC       |
| 106. | mi158a_11R2 | 26 | AAAAAAAAAAAAAAAAAAAAAAAAATAGAACAATAA  |
| 107. | mi158a_12R2 | 26 | AAAAAAAAAAAAAAAAAAAAAAAAATAGAACAATAAT |
| 108. | mi158a_6R3  | 26 | AAAAAAAAAAAAAAAAAAAAAAAAATGTTAA       |
| 109. | mi158a_11R3 | 26 | AAAAAAAAAAAAAAAAAAAAAAAAATGTTAAGTTTA  |
| 110. | mi158a_12R3 | 26 | AAAAAAAAAAAAAAAAAAAAAAAAATGTTAAGTTTAT |

|      |             |    |                               |
|------|-------------|----|-------------------------------|
| 111. | mi159a_6R1  | 26 | AAAAAAAAAAAAAAAAAAAAAAGGTGAA  |
| 112. | mi159a_11R1 | 26 | AAAAAAAAAAAAAAAAAAGGTGAAAGAAG |
| 113. | mi159a_6R2  | 26 | AAAAAAAAAAAAAAAAAAAAAATTAAAG  |
| 114. | mi159a_11R2 | 26 | AAAAAAAAAAAAAAAAAATTAAAGATGAA |
| 115. | mi159a_6R3  | 26 | AAAAAAAAAAAAAAAAAAAAAATTGCAT  |
| 116. | mi159a_11R3 | 26 | AAAAAAAAAAAAAAAAAATTGCATAAACC |
| 117. | mi159a_6R4  | 26 | AAAAAAAAAAAAAAAAAAAAAATTGTAG  |
| 118. | mi159a_11R4 | 26 | AAAAAAAAAAAAAAAAAATTGTAGAACAG |

#### mRNA splicing analyses

|      |           |    |                             |
|------|-----------|----|-----------------------------|
| 119. | H1.1_F    | 25 | TTAAGTTCAGAAGACGATGTCAGAG   |
| 120. | H1.1_R    | 25 | CAAAGGAACTGTGAATAACAAGAAC   |
| 121. | INT4_F    | 25 | TTGGGTTATCATCGTTGGAAGAATC   |
| 122. | INT4_R    | 25 | GCGACAACATAAGCACAACTGAAC    |
| 123. | 1g13900_F | 25 | TCCTGGTTGGATTTTGTATACCGTC   |
| 124. | 1g13900_R | 25 | TCTTGTGTGCGGATAAATGTCGTGT   |
| 125. | 3g61770_F | 21 | ATCTTTCTTCGCCAAGTCTCC       |
| 126. | 3g61770_R | 26 | GAATAAAAGACATCTTCTTAGACTGA  |
| 127. | 5g65660_F | 23 | CCCTGTTCTCACCAAACCTCTCAA    |
| 128. | 5g65660_R | 26 | CCTTCTTTCGTTTCGTTATCTTATAGC |
| 129. | 4g23260_F | 22 | GGGAAGTGTATCCCTTCTCTGG      |
| 130. | 4g23260_R | 20 | GGAAAAGTTGCTTGTCGCCG        |

#### pri-miRNA splicing analyses

|      |            |    |                          |
|------|------------|----|--------------------------|
| 131. | mi166bsp_F | 24 | GACTCTTATTCTAATACAATCTCA |
| 132. | mi166bsp_R | 22 | ATAGATTTAGCCTCTCTGAATG   |

---

**1-4.** Primers used for the analysis of RNA contamination with genomic DNA. **5-6. and 7-8.** Primers used for normalization in Real Time PCR and qRT-PCR analysis, respectively. **9.** Universal primer used for cDNA synthesis in all RACE experiments, unless otherwise stated; **10-11.** Universal primers used for PCR and nested PCR, respectively, in all RACE experiments (unless otherwise stated); **12-53.** miRNA-specific primers used for PCR (3RXXXx\_1) and nested PCR (3RXXXx\_2) in 3'RACE experiments. Note that in the case of miR393a two sets of primers were used: 50-51 and 52-53 **54.** miR169f-specific primer used for cDNA synthesis in 5'RACE. **55-62.** miRNA-specific primers used for PCR (5RXXXx\_1) and nested PCR (5RXXXx\_2) in 5'RACE experiments. **63-102.** miRNA-specific primers used for pri-miRNA full-length cDNA amplification. **103-118.** miRNA-specific primers use for the amplification of pri-miRNA forms differing at their 3'ends.**119-130.** Gene-specific primers used for mRNA splicing analyses. **131-132.** miRNA-specific primers used for pri-miRNA splicing analyses.
