# Supplementary material for: Gene structures and processing of Arabidopsis thaliana HYL1-dependent pri-miRNAs
Source: Oxford University Press journal article supplement (doi:10.1093/nar/gkp189), 2009-03-20
Supplement: gkp189_Supplementary_Data.zip [file gkp189_Supplementary_Data.zip › nar-02598-c-2008-File010.xls]

## Sheet: A. real-time PCR data part I
	Table S2. A. pri-miRNA real-time PCR analysis (part I).
	No.	miRNA		I biological replica										II biological replica										III biological replica
				hyl1			WT			hyl1 vs wt				hyl1			WT			hyl1 vs wt				hyl1			WT			hyl1 vs wt
				Ct hyl1	ΔCt hyl1	R2 hyl1	Ct wt	ΔCt wt	R2 wt	ΔΔCt	2^-ΔΔCt	log		Ct hyl1	ΔCt hyl1	R2 hyl1	Ct wt	ΔCt wt	R2 wt	ΔΔCt	2^-ΔΔCt	log		Ct hyl1	ΔCt hyl1	R2 hyl1	Ct wt	ΔCt wt	R2 wt	ΔΔCt	2^-ΔΔCt	log
	1	ATHmiR156a		35.942	15.8494	0.99945	39.1595	19.3743	0.999649	-3.52485	11.5103	3.52485		32.6481	13.0538	0.99967	35.62	16.1085	0.998751	-3.05478	8.30961	3.05478		29.9779	11.1499	0.998	40	21.337	0.79865	-10.1871	1165.76	10.1871
	2	ATHmiR156b		40	19.9074	0.99759	40	20.2147	0.971605	-0.307301	1.23739	0.307301		39.1473	19.553	0.997497	40	20.4885	0.996735	-0.935528	1.91259	0.935528		36.5266	17.6986	1	40	21.337	0.9335	-3.63838	12.4527	3.63838
	3	ATHmiR156c		29.2649	9.17237	0.999642	36.3497	16.5644	0.999937	-7.39206	167.97	7.39206		26.9586	7.36426	0.999992	32.9107	13.3992	0.999626	-6.03494	65.569	6.03494		26.3327	7.5047	1	31.723	13.06	0.999133	-5.55532	47.0238	5.55532
	4	ATHmiR156d		35.0024	14.9098	0.999053	35.3598	15.5745	0.999549	-0.664742	1.58528	0.664742		32.8583	13.264	0.999787	35.3696	15.8581	0.999261	-2.59416	6.03839	2.59416		30.7392	11.9112	1	31.9736	13.3106	0.999353	-1.39937	2.63786	1.39937
	5	ATHmiR156e		40	19.9074	0.11593	40	20.2147	0.797299	-0.307301	1.23739	0.307301		39.0915	19.4972	0.999805	40	20.4885	0.951806	-0.991353	1.98805	0.991353		39.3631	20.5351	0.999	40	21.337	0.818453	-0.801875	1.74337	0.801875
	6	ATHmiR156f		40	19.9074	0.836439	40	20.2147	0.801798	-0.307301	1.23739	0.307301		40	20.4057	0.999452	40	20.4885	0.944025	-0.0828681	1.05912	0.0828681		40	21.172	0.774	40	21.337	0.914483	-0.165	1.12117	0.165
	7	ATHmiR156g		40	19.9074	0.998621	40	20.2147	0.978404	-0.307301	1.23739	0.307301		35.6785	16.0841	0.999213	36.1894	16.6779	0.999827	-0.593802	1.50922	0.593802		39.1977	20.3697	0.993	34.1703	15.5073	0.819661	4.86235	0.0343784	-4.86235
	8	ATHmiR156h		40	19.9074	0.906852	39.084	19.2987	0.999397	0.608707	0.655784	-0.608707		36.804	17.2097	0.999965	38.0768	18.5653	0.999772	-1.35563	2.55909	1.35563		36.4514	17.6234	1	38.2271	19.5641	0.997488	-1.94067	3.83883	1.94067
	9	ATHmiR157a		32.633	12.5405	0.997128	35.9205	16.1352	0.999572	-3.59479	12.082	3.59479		29.8503	10.256	0.999304	32.8018	13.2903	0.999626	-3.03437	8.19288	3.03437		29.9043	11.0763	0.999	32.3584	13.6954	0.999869	-2.61912	6.14373	2.61912
	10	ATHmiR157b		40	19.9074	0.989512	36.0966	16.3113	0.999805	3.59609	0.0826929	-3.59609		35.9659	16.3716	0.998145	35.9246	16.4131	0.999735	-0.0415201	1.0292	0.0415201		33.7933	14.9653	1	36.479	17.816	0.999791	-2.85065	7.21326	2.85065
	11	ATHmiR157c		25.5703	5.4777	0.998586	29.7394	9.95417	0.99941	-4.47647	22.2613	4.47647		23.7313	4.13694	0.99827	27.357	7.84553	0.999348	-3.7086	13.0737	3.7086		L	L	L	L	L	L	L	L	L
	12	ATHmiR157d		40	19.9074	0.974541	36.9474	17.1621	0.999921	2.74529	0.149137	-2.74529		36.8766	17.2823	0.999188	35.6453	16.1338	0.999737	1.14844	0.451113	-1.14844		37.2722	18.4442	0.999	37.3736	18.7106	0.999702	-0.266464	1.20286	0.266464
	13	ATHmiR158a		28.1064	8.01384	0.999328	31.909	12.1237	0.999886	-4.10986	17.2659	4.10986		26.3246	6.73027	0.999528	29.9621	10.4507	0.999645	-3.72039	13.181	3.72039		25.8661	7.03809	1	29.7734	11.1104	0.99923	-4.07229	16.8222	4.07229
	14	ATHmiR158b		36.7427	16.6501	0.999935	37.6554	17.8701	0.999903	-1.21998	2.32944	1.21998		34.3909	14.7965	0.999858	34.7582	15.2467	0.99911	-0.450175	1.36621	0.450175		32.863	14.035	0.998	35.4537	16.7907	0.996272	-2.75572	6.75391	2.75572
	15	ATHmiR159a		27.0241	6.93158	0.999698	31.5793	11.794	0.999909	-4.86242	29.0894	4.86242		25.3247	5.73039	0.999906	30.7692	11.2577	0.999928	-5.52731	46.1196	5.52731		27.0867	8.25869	0.999	33.2803	14.6173	0.998311	-6.35858	82.0585	6.35858
	16	ATHmiR159b		26.9222	6.82966	0.99843	29.905	10.1198	0.999765	-3.29012	9.78197	3.29012		25.5353	5.94098	0.999487	30.2244	10.7129	0.944483	-4.77195	27.3212	4.77195		26.5735	7.74551	1	29.4468	10.7838	0.999846	-3.03825	8.21492	3.03825
	17	ATHmiR159c		40	19.9074	0.970727	40	20.2147	0.951881	-0.307301	1.23739	0.307301		40	20.4057	0.985474	39.775	20.2635	0.994053	0.14215	0.906168	-0.14215		40	21.172	0.233	40	21.337	0.994651	-0.165	1.12117	0.165
	18	ATHmiR160a		30.5101	10.4176	0.999229	35.1796	15.3943	0.99967	-4.97678	31.4891	4.97678		28.6132	9.01887	0.999312	34.4577	14.9462	0.999504	-5.92737	60.858	5.92737		28.2283	9.40032	0.999	32.7097	14.0467	0.999977	-4.6464	25.0441	4.6464
	19	ATHmiR160b		30.3997	10.3071	0.999424	32.5765	12.7912	0.99998	-2.48405	5.59468	2.48405		27.8373	8.24295	0.999891	31.1266	11.6151	0.999635	-3.37214	10.3542	3.37214		30.4418	11.6138	1	33.4324	14.7694	0.996029	-3.15558	8.91095	3.15558
	20	ATHmiR160c		26.9786	6.88604	0.999007	31.3433	11.5581	0.999916	-4.67203	25.493	4.67203		25.6778	6.08346	0.999672	30.2665	10.755	0.997953	-4.67159	25.4853	4.67159		27.5054	8.6774	0.998	31.8337	13.1707	0.998048	-4.49327	22.5221	4.49327
	21	ATHmiR161		28.0601	7.96756	0.999973	33.2365	13.4512	0.999593	-5.48366	44.7453	5.48366		26.2181	6.62379	0.999986	31.4375	11.926	0.999929	-5.30225	39.4582	5.30225		26.0163	7.18829	1	33.1889	14.5259	0.999106	-7.33757	161.744	7.33757
	22	ATHmiR162a		29.391	9.29846	0.999776	31.8831	12.0978	0.999557	-2.79936	6.9613	2.79936		27.543	7.94863	0.999904	28.9576	9.44616	0.999846	-1.49754	2.8236	1.49754		28.0901	9.26209	0.997	28.0783	9.41529	0.999139	-0.153202	1.11203	0.153202
	23	ATHmiR162b		32.373	12.2805	0.999993	34.1389	14.3536	0.999284	-2.07314	4.20801	2.07314		30.6511	11.0567	0.999431	33.5201	14.0086	0.99866	-2.95188	7.73757	2.95188		29.8654	11.0374	0.999	31.9278	13.2648	0.997063	-2.22743	4.68297	2.22743
	24	ATHmiR163		27.202	7.10946	0.99973	30.4736	10.6883	0.999985	-3.57883	11.9491	3.57883		26.254	6.65962	0.999933	29.4129	9.90143	0.999879	-3.24182	9.45985	3.24182		25.2136	6.38558	1	26.0557	7.39268	0.998019	-1.00709	2.00986	1.00709
	25	ATHmiR164a		40	19.9074	0.99607	35.3374	15.5522	0.999814	4.35527	0.0488577	-4.35527		33.3825	13.7882	0.999886	34.2448	14.7333	0.999772	-0.945097	1.92532	0.945097		33.2325	14.4045	0.999	40	21.337	0.942317	-6.93247	122.147	6.93247
	26	ATHmiR164b		31.064	10.9714	0.99849	35.0981	15.3129	0.999942	-4.34148	20.2728	4.34148		27.0143	7.41999	0.999288	33.7408	14.2293	0.997201	-6.80936	112.156	6.80936		28.468	9.64001	0.998	32.7527	14.0897	0.998168	-4.4497	21.8522	4.4497
	27	ATHmiR164c		29.0925	8.99998	0.99971	32.7393	12.954	0.999778	-3.95405	15.4984	3.95405		26.5721	6.9778	0.999772	30.3625	10.851	0.999267	-3.87324	14.6541	3.87324		29.656	10.828	1	32.7703	14.1073	0.999763	-3.2793	9.70885	3.2793
	28	ATHmiR165a		28.7257	8.63313	0.999928	33.7457	13.9605	0.999888	-5.32735	40.1505	5.32735		26.3198	6.72546	0.999764	31.9899	12.4784	0.997623	-5.75293	53.9267	5.75293		25.9278	7.09981	1	31.7764	13.1134	0.998889	-6.01355	64.604	6.01355
	29	ATHmiR165b		33.8335	13.741	0.999398	36.2268	16.4415	0.999952	-2.70053	6.50042	2.70053		29.955	10.3607	0.999538	34.0254	14.514	0.999762	-4.15331	17.7939	4.15331		31.9632	13.1352	0.999	40	21.337	0.961174	-8.20185	294.443	8.20185
	30	ATHmiR166a		25.1984	5.10586	0.999644	31.2383	11.453	0.999945	-6.34715	81.4111	6.34715		23.5175	3.92314	0.999946	30.1977	10.6862	0.999607	-6.76311	108.617	6.76311		23.6485	4.82054	0.999	30.5364	11.8734	0.999609	-7.05288	132.778	7.05288
	31	ATHmiR166b		28.1278	8.03524	0.997928	34.7602	14.975	0.997171	-6.93972	122.762	6.93972		25.9876	6.39328	0.999687	33.2677	13.7562	0.999996	-7.36294	164.614	7.36294		26.5075	7.67945	0.993	32.6421	13.9791	0.996251	-6.29966	78.7745	6.29966
	32	ATHmiR166c		32.2184	12.1258	0.998652	34.4091	14.6238	0.999587	-2.49798	5.64895	2.49798		32.4022	12.8078	0.999133	32.5192	13.0077	0.999091	-0.199895	1.14861	0.199895		33.0863	14.2583	1	33.6658	15.0028	0.997154	-0.744473	1.67536	0.744473
	33	ATHmiR166d		40	19.9074	0.945738	35.8225	16.0372	0.999711	3.87019	0.0683846	-3.87019		40	20.4057	0.976614	34.4273	14.9158	0.999783	5.48981	0.0222537	-5.48981		40	21.172	0.961	40	21.337	0.216578	-0.165	1.12117	0.165
	34	ATHmiR166e		29.5971	9.50452	0.997221	32.2099	12.4246	0.999075	-2.92011	7.56904	2.92011		26.7749	7.18058	0.999897	31.4176	11.9062	0.999885	-4.72559	26.4572	4.72559		29.8515	11.0235	0.999	31.3208	12.6578	0.997211	-1.63426	3.10429	1.63426
	35	ATHmiR166f		34.0231	13.9305	0.997979	37.2013	17.4161	0.999614	-3.48559	11.2013	3.48559		34.4194	14.8251	0.99998	33.754	14.2425	0.99945	0.582619	0.667751	-0.582619		33.043	14.215	0.997	34.1218	15.4588	0.999629	-1.2438	2.36821	1.2438
	36	ATHmiR166g		35.1854	15.0928	0.999986	34.4196	14.6344	0.999483	0.458447	0.727769	-0.458447		33.3245	13.7302	0.999583	33.3499	13.8384	0.999833	-0.108253	1.07792	0.108253		32.6135	13.7855	1	33.017	14.354	0.999739	-0.568442	1.48292	0.568442
	37	ATHmiR167a		25.0819	4.98934	0.999112	28.9235	9.13821	0.99987	-4.14887	17.7392	4.14887		22.8305	3.23613	0.998805	27.6317	8.12024	0.999219	-4.8841	29.5298	4.8841		23.8472	5.01918	0.998	24.0698	5.40679	0.998823	-0.387608	1.30822	0.387608
	38	ATHmiR167b		29.297	9.20439	0.999946	29.0382	9.25296	0.997418	-0.0485649	1.03424	0.0485649		27.8183	8.22396	0.999392	27.2051	7.69358	0.999568	0.530382	0.692371	-0.530382		27.6958	8.86775	0.994	28.7712	10.1082	0.998512	-1.24049	2.3628	1.24049
	39	ATHmiR167c		36.1905	16.0979	0.999783	40	20.2147	0.985874	-4.11683	17.3496	4.11683		33.248	13.6537	0.999963	35.9903	16.4788	0.999765	-2.82516	7.0869	2.82516		33.5853	14.7573	0.999	37.5857	18.9227	0.998444	-4.16536	17.9432	4.16536
	40	ATHmiR167d		25.9703	5.8777	0.999836	28.5932	8.80789	0.999748	-2.93019	7.62213	2.93019		23.3396	3.74523	0.99941	24.8075	5.296	0.9995	-1.55077	2.92973	1.55077		24.3191	5.4911	0.998	25.0276	6.36462	0.999777	-0.873526	1.83214	0.873526
	41	ATHmiR168a		25.3217	5.22918	0.999607	29.9176	10.1323	0.999951	-4.90316	29.9226	4.90316		23.9524	4.35806	0.999613	28.6311	9.11966	0.999853	-4.76159	27.1258	4.76159		24.8101	5.98211	1	28.4893	9.8263	0.998979	-3.84419	14.3621	3.84419
	42	ATHmiR168b		29.9373	9.84473	0.9995	33.6102	13.8249	0.999718	-3.98017	15.7816	3.98017		29.0283	9.43395	0.999723	32.7983	13.2868	0.99989	-3.85284	14.4484	3.85284		28.9473	10.1193	0.998	32.3692	13.7062	0.985337	-3.58685	12.0157	3.58685
	43	ATHmiR169a		27.9311	7.83856	0.998753	32.1756	12.3903	0.999959	-4.55174	23.4536	4.55174		25.2292	5.63482	0.999224	30.2609	10.7494	0.999779	-5.1146	34.6455	5.1146		27.2471	8.41907	1	31.3641	12.7011	0.999609	-4.28204	19.4546	4.28204
	44	ATHmiR169b		40	19.9074	0.764264	35.5595	15.7742	0.999826	4.13319	0.0569882	-4.13319		40	20.4057	0.995192	34.0747	14.5633	0.999864	5.8424	0.0174286	-5.8424		34.7676	15.9396	1	40	21.337	0.927144	-5.39738	42.1475	5.39738
	45	ATHmiR169c		40	19.9074	0.991996	35.9	16.1147	0.999831	3.79271	0.0721572	-3.79271		37.9439	18.3496	0.998569	36.9092	17.3977	0.999792	0.95186	0.516966	-0.95186		40	21.172	0.896	40	21.337	0.935143	-0.165	1.12117	0.165
	46	ATHmiR169d		33.1435	13.051	0.999995	33.0677	13.2824	0.999931	-0.231488	1.17405	0.231488		32.6463	13.052	0.999779	31.4384	11.927	0.999812	1.12502	0.458497	-1.12502		30.0234	11.1954	0.999	32.8293	14.1663	0.998378	-2.97085	7.84	2.97085
	47	ATHmiR169e		32.9742	12.8816	0.999402	33.5056	13.7204	0.999639	-0.838735	1.78848	0.838735		32.9904	13.396	0.999976	32.0615	12.55	0.999278	0.846003	0.556324	-0.846003		28.7433	9.91528	1	30.2845	11.6215	0.999438	-1.70625	3.26312	1.70625
	48	ATHmiR169f		29.1951	9.10251	0.999531	34.563	14.7777	0.999986	-5.67517	51.0972	5.67517		29.4395	9.8452	0.999734	32.7113	13.1998	0.999197	-3.35459	10.229	3.35459		29.5644	10.7364	0.999	33.7146	15.0516	0.999816	-4.31514	19.9061	4.31514
	49	ATHmiR169g		30.6454	10.5529	0.999394	32.1658	12.3805	0.999481	-1.82765	3.54959	1.82765		30.4404	10.8461	0.999733	31.3473	11.8358	0.998894	-0.989716	1.98579	0.989716		30.8345	12.0065	0.999	33.3236	14.6606	0.997927	-2.6541	6.29456	2.6541
	50	ATHmiR169h		29.3295	9.23692	0.999856	32.7622	12.9769	0.999899	-3.73999	13.3614	3.73999		27.497	7.9027	0.999622	32.5724	13.0609	0.998267	-5.15824	35.7097	5.15824		27.519	8.69103	0.998	31.679	13.016	0.999774	-4.32492	20.0415	4.32492
	51	ATHmiR169i		29.5547	9.46209	0.999676	29.659	9.87374	0.99985	-0.411654	1.33021	0.411654		28.2191	8.6248	0.999864	28.0054	8.4939	0.998665	0.130897	0.913264	-0.130897		28.1651	9.33708	0.998	28.9552	10.2922	0.999351	-0.955138	1.93877	0.955138
	52	ATHmiR169j		28.7923	8.69978	0.998524	30.3099	10.5246	0.999882	-1.82483	3.54265	1.82483		26.9889	7.39455	0.999577	29.0616	9.55012	0.999894	-2.15557	4.45545	2.15557		27.0598	8.23177	1	29.7505	11.0875	0.999417	-2.85569	7.23849	2.85569
	53	ATHmiR169k		29.627	9.53444	0.998345	28.6072	8.82188	0.999512	0.712554	0.610239	-0.712554		26.8868	7.29245	0.999639	25.487	5.97553	0.999586	1.31692	0.401391	-1.31692		26.8928	8.06481	0.999	28.0324	9.36945	0.999754	-1.30464	2.47022	1.30464
	54	ATHmiR169l		28.3054	8.2128	0.995159	29.3422	9.55692	0.999302	-1.34412	2.53876	1.34412		25.9576	6.36323	0.998715	28.6011	9.08963	0.999434	-2.7264	6.61803	2.7264		25.6971	6.8691	1	28.3241	9.66109	0.999276	-2.79199	6.92586	2.79199
	55	ATHmiR169m		32.2194	12.1269	0.999387	31.4708	11.6856	0.999882	0.441323	0.736459	-0.441323		32.5223	12.9279	0.955581	26.1888	6.67735	0.99977	6.25059	0.0131336	-6.25059		27.0513	8.22327	1	29.4736	10.8106	0.990394	-2.58735	6.00994	2.58735
	56	ATHmiR169n		30.5184	10.4258	0.999298	32.4833	12.698	0.999935	-2.27222	4.83068	2.27222		28.6894	9.09504	0.999989	31.5611	12.0496	0.990678	-2.95458	7.75208	2.95458		27.7442	8.9162	0.999	30.3025	11.6395	0.998297	-2.72329	6.60376	2.72329
	57	ATHmiR170		30.8976	10.805	0.999805	31.203	11.4178	0.999982	-0.612753	1.52917	0.612753		28.4507	8.85636	0.99934	30.5114	10.9999	0.999301	-2.14352	4.41838	2.14352		30.1695	11.3415	0.993	30.5915	11.9285	0.996941	-0.586971	1.50209	0.586971
	58	ATHmiR171a		35.4934	15.4009	0.998418	34.807	15.0217	0.99957	0.379138	0.768897	-0.379138		30.5918	10.9975	0.998972	31.5232	12.0117	0.998889	-1.01427	2.01988	1.01427		30.8893	12.0613	1	35.3607	16.6977	0.998255	-4.63643	24.8717	4.63643
	59	ATHmiR171b		27.372	7.27946	0.999848	31.8795	12.0942	0.999601	-4.81474	28.1437	4.81474		24.6486	5.05429	0.999741	29.4391	9.92762	0.999692	-4.87333	29.3102	4.87333		24.2357	5.40774	0.997	28.7927	10.1297	0.998334	-4.72195	26.3905	4.72195
	60	ATHmiR171c		25.8408	5.74828	0.999568	32.47	12.6847	0.999468	-6.93642	122.482	6.93642		23.3256	3.73123	0.999414	29.4521	9.94065	0.999795	-6.20942	73.9984	6.20942		24.4266	5.59865	1	29.9064	11.2434	0.998809	-5.64476	50.0314	5.64476
	61	ATHmiR172a		27.7164	7.62388	0.999847	33.3985	13.6133	0.999706	-5.98938	63.5308	5.98938		25.332	5.73764	0.999733	31.5131	12.0016	0.999598	-6.26395	76.8485	6.26395		24.1551	5.3271	0.998	28.7951	10.1321	0.998819	-4.80504	27.9552	4.80504
	62	ATHmiR172b		22.537	2.44444	0.999622	29.5147	9.72947	0.99995	-7.28503	155.96	7.28503		20.8141	1.21977	0.9993	27.4469	7.93544	0.999346	-6.71567	105.104	6.71567		22.7245	3.89645	0.998	28.5313	9.8683	0.999355	-5.97185	62.7634	5.97185
	63	ATHmiR172c		36.5628	16.4703	0.998761	40	20.2147	0.984588	-3.74446	13.4028	3.74446		34.0279	14.4335	0.999911	35.4785	15.967	0.999833	-1.53352	2.89492	1.53352		40	21.172	0.833	40	21.337	0.858483	-0.165	1.12117	0.165
	64	ATHmiR172d		40	19.9074	0.933235	40	20.2147	0.940074	-0.307301	1.23739	0.307301		40	20.4057	0.883747	32.5055	12.9941	0.999691	7.4116	0.00587337	-7.4116		29.1279	10.2999	0.999	31.2408	12.5778	0.998832	-2.27792	4.84977	2.27792
	65	ATHmiR172e		32.3217	12.2292	0.999087	36.7612	16.9759	0.999981	-4.74673	26.8478	4.74673		31.2452	11.6508	0.999433	34.0665	14.555	0.999685	-2.90415	7.48579	2.90415		33.2863	14.4583	1	40	21.337	0.939624	-6.87872	117.68	6.87872
	66	ATHmiR173		31.0923	10.9997	0.999761	32.284	12.4987	0.998574	-1.49899	2.82646	1.49899		30.5728	10.9784	0.999927	32.2225	12.711	0.998331	-1.73262	3.3233	1.73262		30.5489	11.7209	0.996	32.4827	13.8197	0.999158	-2.09879	4.2835	2.09879
	67	ATHmiR319a		35.773	15.6804	0.999977	40	20.2147	0.927285	-4.5343	23.1718	4.5343		34.3619	14.7676	0.999792	37.8145	18.303	0.999597	-3.53549	11.5954	3.53549		32.778	13.95	0.999	40	21.337	0.701244	-7.38698	167.38	7.38698
	68	ATHmiR319b		31.7544	11.6619	0.999488	34.9855	15.2002	0.999729	-3.53833	11.6183	3.53833		29.5893	9.99497	0.998736	33.33	13.8185	0.999677	-3.82355	14.1581	3.82355		30.6413	11.8133	1	33.3165	14.6535	0.999239	-2.84025	7.16145	2.84025
	69	ATHmiR319c		40	19.9074	0.982697	34.8504	15.0651	0.999573	4.84233	0.0348589	-4.84233		36.0799	16.4856	0.999625	34.2758	14.7643	0.999734	1.72123	0.303289	-1.72123		32.8207	13.9927	0.999	40	21.337	0.833684	-7.34427	162.497	7.34427
	70	ATHmiR393a		30.9366	10.8441	0.999227	33.125	13.3398	0.999224	-2.49571	5.64007	2.49571		30.8904	11.296	0.999975	33.6952	14.1837	0.999902	-2.8877	7.40091	2.8877		30.4182	11.5902	0.999	33.9487	15.2857	0.99973	-3.69552	12.9558	3.69552
	71	ATHmiR393b		31.6739	11.5814	0.998789	36.7081	16.9228	0.99994	-5.34145	40.5448	5.34145		27.7318	8.13746	0.999993	33.8578	14.3463	0.99924	-6.20886	73.9695	6.20886		26.2628	7.43483	0.999	32.2791	13.6161	0.999791	-6.18124	72.5671	6.18124
	72	ATHmiR394a		38.13	18.0374	0.999472	39.1019	19.3166	0.998717	-1.2792	2.42704	1.2792		32.4278	12.8334	0.999616	36.0559	16.5444	0.997768	-3.71095	13.0951	3.71095		33.3867	14.5587	1	40	21.337	0.78822	-6.7783	109.767	6.7783
	73	ATHmiR394b		31.2491	11.1566	0.998889	35.9604	16.1751	0.999662	-5.01853	32.4137	5.01853		29.6959	10.1016	0.999606	31.2513	11.7398	0.999352	-1.6383	3.11298	1.6383		31.377	12.549	1	32.5126	13.8496	0.999674	-1.30063	2.46336	1.30063
	74	ATHmiR395a		28.4766	8.38405	0.999566	34.2217	14.4364	0.999046	-6.05238	66.3663	6.05238		31.7612	12.1668	0.99992	33.0113	13.4998	0.999393	-1.33301	2.51928	1.33301		29.3855	10.5575	1	31.6317	12.9687	0.998559	-2.41115	5.31898	2.41115
	75	ATHmiR395b		27.7236	7.63105	0.999806	31.051	11.2657	0.999977	-3.63467	12.4207	3.63467		29.963	10.3687	0.999364	33.7987	14.2872	0.999865	-3.91851	15.1213	3.91851		29.2559	10.4279	1	30.217	11.554	0.998599	-1.12604	2.1826	1.12604
	76	ATHmiR395c		27.8655	7.77291	0.999615	32.3962	12.6109	0.999994	-4.83802	28.6016	4.83802		29.9759	10.3816	0.999743	33.3009	13.7894	0.999883	-3.40783	10.6135	3.40783		29.7093	10.8813	1	31.5374	12.8744	0.999549	-1.99306	3.9808	1.99306
	77	ATHmiR395d		35.7913	15.6987	0.999806	38.3313	18.546	0.999186	-2.84728	7.19642	2.84728		38.0844	18.49	0.999509	35.3697	15.8582	0.999699	2.63177	0.161346	-2.63177		38.7556	19.9276	0.99	38.6271	19.9641	0.558659	-0.036536	1.02565	0.036536
	78	ATHmiR395e		31.5261	11.4336	0.999827	33.9672	14.1819	0.999959	-2.74834	6.71943	2.74834		39.5462	19.9518	0.99257	35.2053	15.6939	0.999758	4.25796	0.0522669	-4.25796		32.2321	13.4041	0.999	33.7785	15.1155	0.999555	-1.71136	3.27469	1.71136
	79	ATHmiR395f		32.017	11.9244	0.999308	34.5308	14.7455	0.999341	-2.82111	7.06704	2.82111		32.3319	12.7376	0.999415	34.864	15.3525	0.998034	-2.61494	6.12599	2.61494		31.0254	12.1974	0.999	34.5428	15.8798	0.999335	-3.68242	12.8386	3.68242
	80	ATHmiR396a		29.8538	9.76124	0.998148	31.1715	11.3862	0.999371	-1.62498	3.08438	1.62498		27.7604	8.16609	0.999227	27.7369	8.22544	0.995279	-0.0593561	1.042	0.0593561		26.5827	7.75474	0.999	28.1231	9.46013	0.999799	-1.70538	3.26115	1.70538
	81	ATHmiR396b		28.0092	7.91662	0.999587	33.6954	13.9101	0.999775	-5.99352	63.7132	5.99352		25.0884	5.49408	0.999331	31.8611	12.3497	0.986545	-6.85557	115.806	6.85557		25.868	7.03996	0.998	30.5727	11.9097	0.998864	-4.86977	29.238	4.86977
	82	ATHmiR397a		31.2472	11.1547	0.999856	34.0524	14.2672	0.999911	-3.11252	8.64894	3.11252		30.2108	10.6164	0.999882	33.2908	13.7793	0.999863	-3.16283	8.95587	3.16283		29.2419	10.4139	1	32.76	14.097	0.998449	-3.68317	12.8453	3.68317
	83	ATHmiR397b		40	19.9074	0.949757	40	20.2147	0.975647	-0.307301	1.23739	0.307301		40	20.4057	0.981616	34.6497	15.1382	0.998152	5.26747	0.0259617	-5.26747		40	21.172	0.974	40	21.337	0.998387	-0.165	1.12117	0.165
	84	ATHmiR398a		29.7858	9.69328	0.99936	30.2239	10.4386	0.999388	-0.745357	1.67639	0.745357		29.6639	10.0695	0.999688	30.2174	10.7059	0.999688	-0.636362	1.5544	0.636362		28.702	9.87403	0.998	29.7564	11.0934	0.99844	-1.21932	2.32836	1.21932
	85	ATHmiR398b		23.4732	3.38067	0.999602	27.3834	7.5981	0.999562	-4.21743	18.6025	4.21743		22.0494	2.45504	0.998149	27.0316	7.52009	0.99978	-5.06505	33.4759	5.06505		22.2426	3.41456	1	24.4277	5.76471	0.999551	-2.35015	5.09879	2.35015
	86	ATHmiR398c		24.9424	4.8498	0.99976	29.2274	9.44216	0.999656	-4.59236	24.1234	4.59236		23.2696	3.6753	0.999862	28.877	9.36548	0.998911	-5.69018	51.6316	5.69018		22.624	3.79601	1	25.1176	6.45457	0.999618	-2.65856	6.31404	2.65856
	87	ATHmiR399a		31.8127	11.7201	0.99975	34.0274	14.2421	0.999949	-2.52197	5.74365	2.52197		30.1545	10.5602	0.999778	34.1902	14.6788	0.995721	-4.11857	17.3706	4.11857		34.8979	16.0699	1	40	21.337	0.198916	-5.26713	38.5093	5.26713
	88	ATHmiR399b		34.5415	14.449	0.999233	38.0793	18.294	0.999642	-3.84505	14.3706	3.84505		31.4686	11.8742	0.999483	35.989	16.4775	0.997064	-4.60329	24.3068	4.60329		31.7535	12.9255	1	36.5849	17.9219	0.99997	-4.99638	31.9199	4.99638
	89	ATHmiR399c		27.083	6.99043	0.999934	30.7793	10.994	0.999754	-4.00355	16.0395	4.00355		27.3797	7.78539	0.997892	30.9313	11.4198	0.999176	-3.63442	12.4185	3.63442		30.1336	11.3056	0.999	32.9526	14.2896	0.998733	-2.98405	7.91203	2.98405
	90	ATHmiR399d		32.3303	12.2378	0.999535	34.5928	14.8075	0.999455	-2.56977	5.93714	2.56977		30.3182	10.7238	0.999734	36.1857	16.6743	0.999546	-5.95045	61.839	5.95045		34.4464	15.6184	0.998	40	21.337	0.989368	-5.71857	52.6576	5.71857
	91	ATHmiR399e		40	19.9074	0.994117	35.649	15.8637	0.999859	4.04375	0.0606332	-4.04375		40	20.4057	0.802321	35.0166	15.5051	0.999552	4.9005	0.0334813	-4.9005		40	21.172	0.92	40	21.337	0.766364	-0.165	1.12117	0.165
	92	ATHmiR399f		33.9147	13.8222	0.999769	40	20.2147	0.96227	-6.39257	84.0145	6.39257		32.1765	12.5821	0.999974	34.2473	14.7358	0.99995	-2.15372	4.44974	2.15372		33.7544	14.9264	1	39.8211	21.1581	0.983688	-6.23175	75.1523	6.23175
	93	ATHmiR400		31.1145	11.022	0.999295	32.9297	13.1444	0.999967	-2.12248	4.35441	2.12248		29.7685	10.1742	0.999945	35.8333	16.3218	0.999862	-6.14766	70.8973	6.14766		29.348	10.52	1	33.8872	15.2242	0.998835	-4.70423	26.0684	4.70423
	94	ATHmiR401		40	19.9074	0.946962	40	20.2147	0.994526	-0.307301	1.23739	0.307301		40	20.4057	0.978621	37.5014	17.9899	0.999645	2.41571	0.187413	-2.41571		40	21.172	0.891	40	21.337	0.861139	-0.165	1.12117	0.165
	95	ATHmiR402		30.8907	10.7982	0.999661	31.7207	11.9354	0.99959	-1.13725	2.19961	1.13725		29.6502	10.0558	0.999408	33.5534	14.0419	0.99999	-3.98608	15.8463	3.98608		29.8532	11.0252	1	32.536	13.873	0.999797	-2.84774	7.19873	2.84774
	96	ATHmiR403		26.6174	6.52479	0.99974	30.3793	10.5941	0.998306	-4.06928	16.7871	4.06928		25.2935	5.69911	0.998558	29.1122	9.60077	0.999217	-3.90166	14.9457	3.90166		25.0993	6.27129	1	27.9792	9.31624	0.997927	-3.04495	8.25319	3.04495
	97	ATHmiR404		40	19.9074	0.985444	40	20.2147	0.998764	-0.307301	1.23739	0.307301		40	20.4057	0.993685	40	20.4885	0.932318	-0.0828681	1.05912	0.0828681		40	21.172	0.751	40	21.337	0.909863	-0.165	1.12117	0.165
	98	ATHmiR407		40	19.9074	0.934854	40	20.2147	0.995467	-0.307301	1.23739	0.307301		40	20.4057	0.998608	34.8433	15.3318	0.999367	5.0738	0.0296915	-5.0738		40	21.172	0.968	40	21.337	0.782139	-0.165	1.12117	0.165
	99	ATHmiR408		28.0908	7.99828	0.999164	29.287	9.50177	0.999541	-1.50348	2.83526	1.50348		26.3762	6.78188	0.999907	28.7394	9.22796	0.999743	-2.44608	5.44935	2.44608		26.9047	8.07672	1	28.5135	9.85055	0.998763	-1.77383	3.4196	1.77383
	100	ATHmiR413		34.1295	14.0369	0.999862	35.1262	15.341	0.999838	-1.30408	2.46927	1.30408		34.0341	14.4397	0.99994	32.1049	12.5934	0.999595	1.8463	0.278105	-1.8463		34.5393	15.7113	1	36.488	17.825	0.999917	-2.11366	4.32789	2.11366
	101	ATHmiR414		23.056	2.96344	0.999476	22.8945	3.10927	0.999745	-0.145829	1.10637	0.145829		21.8731	2.27878	0.999759	21.7531	2.24157	0.999944	0.0372009	0.974544	-0.0372009		21.9515	3.12349	1	21.606	2.94296	0.999752	0.180533	0.882377	-0.180533
	102	ATHmiR415		27.0017	6.90917	0.999909	26.9067	7.12144	0.999605	-0.212262	1.1585	0.212262		25.4131	5.81878	0.999922	25.1584	5.64693	0.999958	0.171843	0.887708	-0.171843		26.903	8.07504	1	26.236	7.57298	0.998537	0.502055	0.7061	-0.502055
	103	ATHmiR417		35.4637	15.3712	0.999889	40	20.2147	0.911642	-4.84358	28.7119	4.84358		40	20.4057	0.95702	35.6582	16.1467	0.999583	4.25894	0.0522312	-4.25894		40	21.172	0.806	40	21.337	0.540263	-0.165	1.12117	0.165
	104	ATHmiR418		40	19.9074	0.977344	40	20.2147	0.982971	-0.307301	1.23739	0.307301		40	20.4057	0.16419	36.5608	17.0493	0.937085	3.35637	0.0976408	-3.35637		35.1695	16.3415	1	40	21.337	0.974549	-4.99546	31.8994	4.99546
	105	ATHmiR419		31.3212	11.2286	0.99989	31.7055	11.9202	0.999986	-0.691552	1.61502	0.691552		30.1419	10.5476	0.999788	29.057	9.54553	0.999427	1.00202	0.499301	-1.00202		29.8191	10.9911	0.876	29.8041	11.1411	0.655836	-0.149985	1.10956	0.149985
	106	ATHmiR420		34.4091	14.3165	0.999851	33.6973	13.9121	0.999877	0.404413	0.755544	-0.404413		32.9691	13.3747	0.998962	33.0226	13.5112	0.999909	-0.136468	1.09921	0.136468		32.883	14.055	0.844	33.8433	15.1803	0.957858	-1.12526	2.18141	1.12526
	Abbreviations:
	L- lack of data

## Sheet: B. real-time PCR data part II
	Table S2 B. pri-miRNA real-time PCR analysis (part II).
	No.	miRNA		I biological replica										II biological replica										III biological replica
				hyl1			WT			hyl1 vs wt				hyl1			WT			hyl1 vs wt				hyl1			WT			hyl1 vs wt
				Ct hyl1	ΔCt hyl1	R2 hyl1	Ct wt	ΔCt wt	R2 wt	ΔΔCt	2^-ΔΔCt	log		Ct hyl1	ΔCt hyl1	R2 hyl1	Ct wt	ΔCt wt	R2 wt	ΔΔCt	2^-ΔΔCt	log		Ct hyl1	ΔCt hyl1	R2 hyl1	Ct wt	ΔCt wt	R2 wt	ΔΔCt	2^-ΔΔCt	log
	1	ATHmiR390a		40	24.6076	0.423055	40	23.7376	0.974628	0.86999	0.547151	-0.86999		40	21.172	0.894	40	21.337	0.875142	-0.165	1.12117	0.165		33.0804	13.1934	0.999844	36.6043	16.9613	0.997879	-3.76782	13.6215	3.76782
	2	ATHmiR390b		25.7111	10.3187	0.99953	36.5046	20.2422	0.985128	-9.92345	971.079	9.92345		28.6137	9.78566	1	37.6454	18.9824	0.996091	-9.19671	586.796	9.19671		30.3136	10.4266	0.99976	36.6294	16.9864	0.997347	-6.55984	94.3427	6.55984
	3	ATHmiR391		28.0141	12.6218	0.997454	30.316	14.0536	0.99899	-1.43182	2.69788	1.43182		30.1461	11.3181	0.999	30.7335	12.0705	0.999135	-0.752375	1.68456	0.752375		32.3267	12.4397	0.999503	34.1962	14.5532	0.997687	-2.11349	4.32737	2.11349
	4	ATHmiR447a		27.7795	12.3872	0.999447	27.956	11.6936	0.999849	0.693513	0.618346	-0.693513		30.0394	11.2114	0.998	32.5529	13.8899	0.999277	-2.67854	6.40205	2.67854		32.3754	12.4884	0.999174	34.3703	14.7273	0.991767	-2.23886	4.72024	2.23886
	5	ATHmiR447b		26.9878	11.5954	0.999449	26.9311	10.6687	0.999173	0.926705	0.526058	-0.926705		29.6177	10.7897	1	31.9233	13.2603	0.999142	-2.47063	5.54287	2.47063		31.6872	11.8002	0.999891	31.1147	11.4717	0.999786	0.32851	0.796359	-0.32851
	6	ATHmiR447c		31.0865	15.6941	0.998835	32.7932	16.5308	0.999709	-0.836666	1.78592	0.836666		38.1469	19.3189	0.992	40	21.337	0.989145	-2.01809	4.05048	2.01809		40	20.113	0.989239	40	20.357	0.993857	-0.244	1.18427	0.244
	7	ATHmiR472		24.3082	8.91581	0.999055	26.9934	10.731	0.998504	-1.81523	3.51916	1.81523		27.9273	9.09928	0.993	29.3277	10.6647	0.993121	-1.56547	2.95974	1.56547		29.0608	9.17377	0.999408	30.9719	11.3289	0.998629	-2.15515	4.45416	2.15515
	8	ATHmiR771		30.0744	14.682	0.998072	35.748	19.4857	0.985309	-4.80367	27.9286	4.80367		33.9515	15.1235	0.999	34.1924	15.5294	0.998899	-0.405852	1.32487	0.405852		34.6291	14.7421	0.996986	35.2325	15.5895	0.996599	-0.847416	1.79928	0.847416
	9	ATHmiR773		33.8025	18.4101	0.993869	40	23.7376	0.898912	-5.32751	40.1549	5.32751		33.4559	14.6279	0.994	37.8854	19.2224	0.998068	-4.59451	24.1594	4.59451		35.4306	15.5436	0.999439	35.7355	16.0925	0.999404	-0.548829	1.4629	0.548829
	10	ATHmiR774		35.1866	19.7942	0.993267	40	23.7376	0.975916	-3.94342	15.3847	3.94342		35.1898	16.3618	0.999	37.7143	19.0513	0.997745	-2.68954	6.45108	2.68954		40	20.113	0.962125	40	20.357	0.136467	-0.244	1.18427	0.244
	11	ATHmiR775		24.4169	9.02449	0.999841	27.6926	11.4303	0.998338	-2.40578	5.29921	2.40578		28.1451	9.31706	0.999	30.8437	12.1807	0.995717	-2.86362	7.2784	2.86362		29.0254	9.13838	0.997833	31.7046	12.0616	0.995319	-2.92325	7.58552	2.92325
	12	ATHmiR776		40	24.6076	0.826722	40	23.7376	0.793149	0.86999	0.547151	-0.86999		40	21.172	0.773	40	21.337	0.723024	-0.165	1.12117	0.165		40	20.113	0.757648	40	20.357	0.966587	-0.244	1.18427	0.244
	13	ATHmiR777		30.6506	15.2582	0.999112	33.2661	17.0037	0.994245	-1.74551	3.35313	1.74551		33.2592	14.4312	0.999	34.4497	15.7867	0.998906	-1.3555	2.55886	1.3555		35.4576	15.5706	0.996499	40	20.357	0.991737	-4.78638	27.5958	4.78638
	14	ATHmiR778		35.0195	19.6272	0.994371	32.6795	16.4171	0.998797	3.21003	0.108065	-3.21003		34.7113	15.8833	1	37.4339	18.7709	0.99927	-2.88757	7.4002	2.88757		35.3525	15.4655	0.999878	36.8631	17.2201	0.998992	-1.75461	3.37435	1.75461
	15	ATHmiR779		21.7419	6.34951	0.999936	26.9428	10.6804	0.998972	-4.33094	20.1253	4.33094		26.4215	7.59353	0.997	29.6644	11.0014	0.999866	-3.40787	10.6138	3.40787		26.7357	6.84875	0.999249	31.0731	11.4301	0.999016	-4.58136	23.9402	4.58136
	16	ATHmiR780		40	24.6076	0.633096	40	23.7376	0.948466	0.86999	0.547151	-0.86999		40	21.172	0.939	33.2432	14.5802	0.999673	6.59177	0.0103676	-6.59177		40	20.113	0.99064	40	20.357	0.618926	-0.244	1.18427	0.244
	17	ATHmiR781		30.7853	15.3929	0.999232	31.6259	15.3635	0.998585	0.029373	0.979846	-0.029373		32.5482	13.7202	0.999	34.239	15.576	0.998244	-1.85578	3.61948	1.85578		34.5734	14.6864	0.998022	35.5365	15.8935	0.999602	-1.20708	2.30871	1.20708
	18	ATHmiR782		27.3791	11.9867	0.999845	28.6197	12.3574	0.997861	-0.37065	1.29294	0.37065		32.9465	14.1185	1	32.4122	13.7492	0.998531	0.369213	0.774205	-0.369213		32.1807	12.2937	0.999072	32.458	12.815	0.998892	-0.521294	1.43524	0.521294
	19	ATHmiR783		36.2451	20.8527	0.983815	35.7067	19.4444	0.976069	1.40832	0.376751	-1.40832		38.4451	19.6171	0.999	40	21.337	0.9884	-1.71992	3.29417	1.71992		40	20.113	0.959794	40	20.357	0.91427	-0.244	1.18427	0.244
	20	ATHmiR822		25.9631	10.5707	0.999306	27.0637	10.8013	0.999496	-0.230615	1.17334	0.230615		30.2382	11.4102	1	30.5199	11.8569	0.999977	-0.446685	1.3629	0.446685		30.7089	10.8219	0.99902	31.9247	12.2817	0.998884	-1.4598	2.75071	1.4598
	21	ATHmiR823		28.3067	12.9143	0.998949	37.5772	21.3148	0.995576	-8.4005	337.911	8.4005		31.2717	12.4437	1	33.5222	14.8592	0.999194	-2.41547	5.33492	2.41547		32.9119	13.0249	0.999617	36.2165	16.5735	0.997905	-3.54869	11.702	3.54869
	22	ATHmiR824		23.4581	8.06576	0.999168	27.3516	11.0893	0.999048	-3.0235	8.13136	3.0235		27.3227	8.49472	0.998	29.682	11.019	0.998394	-2.52431	5.75298	2.52431		28.2737	8.38671	0.999697	30.9741	11.3311	0.99869	-2.94442	7.69763	2.94442
	23	ATHmiR825		24.3192	8.9268	0.997529	24.7817	8.51933	0.998982	0.407466	0.753946	-0.407466		26.5117	7.68373	1	27.651	8.98805	0.99944	-1.30432	2.46967	1.30432		28.8137	8.92667	0.994056	29.3667	9.72367	0.996966	-0.796992	1.73747	0.796992
	24	ATHmiR826		22.5448	7.1524	0.999758	23.8667	7.60437	0.999743	-0.451972	1.36791	0.451972		27.1489	8.32086	0.998	26.1871	7.52409	0.999259	0.796761	0.57564	-0.796761		26.8889	7.00189	0.99803	28.2956	8.65258	0.99894	-1.65069	3.13983	1.65069
	25	ATHmiR827		25.8605	10.4681	0.996684	28.7807	12.5183	0.994337	-2.05024	4.14175	2.05024		29.1647	10.3367	0.999	31.4347	12.7717	0.99984	-2.43497	5.40754	2.43497		29.0611	9.1741	0.997926	33.3665	13.7235	0.998596	-4.5494	23.4156	4.5494
	26	ATHmiR828		34.2742	18.8818	0.999109	40	23.7376	0.620049	-4.85581	28.9563	4.85581		36.6449	17.8169	0.997	38.0187	19.3557	0.999544	-1.53881	2.90554	1.53881		38.6381	18.7511	0.987744	39.6959	20.0529	0.967548	-1.30173	2.46524	1.30173
	27	ATHmiR829		40	24.6076	0.848655	40	23.7376	0.660544	0.86999	0.547151	-0.86999		40	21.172	0.77	40	21.337	0.975401	-0.165	1.12117	0.165		40	20.113	0.29455	40	20.357	0.86084	-0.244	1.18427	0.244
	28	ATHmiR830		26.4028	11.0104	0.996671	27.3234	11.0611	0.999973	-0.050611	1.0357	0.050611		28.9644	10.1364	1	29.545	10.8819	0.999598	-0.745577	1.67664	0.745577		30.767	10.88	0.999732	30.7708	11.1278	0.999755	-0.247819	1.18741	0.247819
	29	ATHmiR831		40	24.6076	0.900315	40	23.7376	0.883138	0.86999	0.547151	-0.86999		37.4922	18.6642	1	38.2563	19.5933	0.986489	-0.929066	1.90404	0.929066		39.3167	19.4297	0.982704	37.1254	17.4824	0.998456	1.9473	0.259301	-1.9473
	30	ATHmiR832		39.6948	24.3025	0.804219	35.7764	19.5141	0.962648	4.78841	0.0361864	-4.78841		15.4834	-3.34457	0.636	37.7352	19.0722	0.99827	-22.4168	5.59924e+06	22.4168		37.967	18.08	0.998494	40	20.357	0.977581	-2.27697	4.8466	2.27697
	31	ATHmiR833		40	24.6076	0.578211	40	23.7376	0.809763	0.86999	0.547151	-0.86999		40	21.172	0.966	40	21.337	0.773242	-0.165	1.12117	0.165		40	20.113	0.997498	39.9988	20.3558	0.998622	-0.24278	1.18327	0.24278
	32	ATHmiR834		28.3903	12.9979	0.999124	28.4794	12.2171	0.99971	0.780814	0.582038	-0.780814		31.3994	12.5714	1	31.9532	13.2902	0.99976	-0.718795	1.64581	0.718795		33.7491	13.8621	0.998806	32.964	13.321	0.999782	0.541094	0.68725	-0.541094
	33	ATHmiR835		24.9128	9.52045	0.985112	25.3247	9.06231	0.995344	0.458131	0.727929	-0.458131		27.2454	8.41736	0.997	24.2564	5.59336	0.99835	2.824	0.141218	-2.824		29.485	9.59797	0.997326	30.1121	10.4691	0.989622	-0.871165	1.82914	0.871165
	34	ATHmiR836		36.2427	20.8503	0.996134	40	23.7376	0.647706	-2.88735	7.3991	2.88735		40	21.172	0.752	40	21.337	0.967573	-0.165	1.12117	0.165		40	20.113	0.986974	40	20.357	0.00747186	-0.244	1.18427	0.244
	35	ATHmiR837		40	24.6076	0.869306	40	23.7376	0.524014	0.86999	0.547151	-0.86999		40	21.172	0.879	40	21.337	0.889495	-0.165	1.12117	0.165		40	20.113	0.844044	40	20.357	0.756118	-0.244	1.18427	0.244
	36	ATHmiR838		25.037	9.64465	0.99831	25.3826	9.12019	0.995715	0.524458	0.69522	-0.524458		27.8982	9.0702	1	28.5387	9.8757	0.999991	-0.805501	1.74775	0.805501		29.4695	9.58253	0.998858	29.6124	9.96942	0.998707	-0.386889	1.30757	0.386889
	37	ATHmiR839		33.7262	18.3338	0.996692	32.1631	15.9007	0.999598	2.43309	0.185168	-2.43309		36.0469	17.2189	0.999	40	21.337	0.997734	-4.11814	17.3653	4.11814		36.5422	16.6552	0.998628	40	20.357	0.906905	-3.70177	13.012	3.70177
	38	ATHmiR840		27.911	12.5186	0.999898	28.9274	12.665	0.99906	-0.146396	1.1068	0.146396		31.5793	12.7513	0.999	31.2371	12.5741	0.999695	0.177155	0.884445	-0.177155		32.1727	12.2857	0.99904	32.1502	12.5072	0.999543	-0.221509	1.16595	0.221509
	39	ATHmiR841		29.4524	14.06	0.999647	27.9952	11.7328	0.996082	2.32719	0.199272	-2.32719		31.0287	12.2007	1	31.0711	12.4081	0.999821	-0.20745	1.15465	0.20745		35.2135	15.3265	0.99615	31.3944	11.7514	0.998956	3.57511	0.0839044	-3.57511
	40	ATHmiR842		40	24.6076	0.743651	32.9312	16.6688	0.994334	7.93882	0.00407546	-7.93882		34.6421	15.8141	0.999	36.9872	18.3242	0.995546	-2.51012	5.69667	2.51012		37.973	18.086	0.98317	38.0382	18.3952	0.998462	-0.30917	1.23899	0.30917
	41	ATHmiR843		40	24.6076	0.923392	40	23.7376	0.883591	0.86999	0.547151	-0.86999		33.9284	15.1004	1	40	21.337	0.992568	-6.23659	75.4051	6.23659		40	20.113	0.968511	40	20.357	0.802556	-0.244	1.18427	0.244
	42	ATHmiR844		25.4651	10.0727	0.999544	27.5901	11.3277	0.999517	-1.255	2.38667	1.255		28.5553	9.72728	0.999	28.9892	10.3262	0.999668	-0.598937	1.5146	0.598937		29.2299	9.34295	0.999892	30.9092	11.2662	0.999071	-1.92325	3.79277	1.92325
	43	ATHmiR845a		32.4737	17.0813	0.999972	32.2858	16.0234	0.999736	1.05795	0.480313	-1.05795		34.9903	16.1623	1	34.9	16.237	0.999973	-0.074775	1.0532	0.074775		34.9221	15.0351	0.997177	33.5135	13.8705	0.999869	1.16456	0.446099	-1.16456
	44	ATHmiR845b		40	24.6076	0.182592	40	23.7376	0.540478	0.86999	0.547151	-0.86999		37.4638	18.6358	0.997	40	21.337	0.849308	-2.70122	6.50352	2.70122		40	20.113	0.992493	40	20.357	0.918517	-0.244	1.18427	0.244
	45	ATHmiR846		30.6674	15.2751	0.995828	40	23.7376	0.852508	-8.46256	352.765	8.46256		32.0353	13.2073	0.997	39.5088	20.8458	0.99226	-7.63843	199.249	7.63843		34.0048	14.1178	0.998312	40	20.357	0.762333	-6.23918	75.5407	6.23918
	46	ATHmiR847		31.9812	16.5889	0.997447	40	23.7376	0.912327	-7.14877	141.904	7.14877		40	21.172	0.252	35.0249	16.3619	0.999983	4.81011	0.0356461	-4.81011		37.1768	17.2898	0.996847	40	20.357	0.764162	-3.06721	8.38151	3.06721
	47	ATHmiR848		31.5356	16.1432	0.999727	30.8919	14.6295	0.997518	1.51372	0.350207	-1.51372		32.7575	13.9295	0.999	33.2189	14.5559	0.999661	-0.62641	1.54372	0.62641		38.3782	18.4912	0.994973	33.9426	14.2996	0.99953	4.19161	0.0547267	-4.19161
	48	ATHmiR849		31.5102	16.1179	0.999489	30.2354	13.973	0.999861	2.14485	0.226119	-2.14485		32.6453	13.8173	1	30.9423	12.2793	0.997427	1.53801	0.344361	-1.53801		34.2706	14.3836	0.99936	35.4464	15.8034	0.997906	-1.41979	2.67546	1.41979
	49	ATHmiR850		19.5781	4.18575	0.999609	20.6835	4.42108	0.99871	-0.235338	1.17718	0.235338		24.9534	6.12537	0.999	24.3551	5.69206	0.999029	0.433308	0.740562	-0.433308		26.4398	6.55277	0.999787	26.5091	6.86613	0.999005	-0.313357	1.2426	0.313357
	50	ATHmiR851		30.4347	15.0423	0.995571	31.8916	15.6292	0.998623	-0.586878	1.50199	0.586878		33.4349	14.6069	0.999	34.8885	16.2255	0.999439	-1.61852	3.07059	1.61852		35.3311	15.4441	0.998796	40	20.357	0.925693	-4.91292	30.1257	4.91292
	51	ATHmiR852		40	24.6076	0.951873	40	23.7376	0.989362	0.86999	0.547151	-0.86999		40	21.172	0.973	40	21.337	0.981359	-0.165	1.12117	0.165		40	20.113	0.910208	40	20.357	0.522348	-0.244	1.18427	0.244
	52	ATHmiR853		27.8318	12.4395	0.99932	29.918	13.6556	0.999816	-1.21614	2.32324	1.21614		32.058	13.23	0.999	31.8707	13.2077	0.999964	0.022313	0.984653	-0.022313		32.4873	12.6003	0.999614	33.535	13.892	0.999884	-1.29175	2.44824	1.29175
	53	ATHmiR854a		29.9371	14.5447	0.999967	30.6416	14.3792	0.996395	0.165545	0.891592	-0.165545		36.3782	17.5502	1	34.9499	16.2869	0.9996	1.2633	0.41659	-1.2633		38.0059	18.1189	0.99936	34.8649	15.2219	0.999295	2.89701	0.134249	-2.89701
	54	ATHmiR854d		30.5081	15.1157	0.999382	34.3811	18.1187	0.998497	-3.00299	8.01661	3.00299		33.6243	14.7963	0.998	34.3548	15.6918	0.999999	-0.895467	1.86021	0.895467		35.7988	15.9118	0.999907	35.0272	15.3842	0.999566	0.527637	0.69369	-0.527637
	55	ATHmiR855		40	24.6076	0.808936	40	23.7376	0.889196	0.86999	0.547151	-0.86999		34.5971	15.7691	0.999	38.1627	19.4997	0.997474	-3.73057	13.2744	3.73057		36.5428	16.6558	0.99739	37.3258	17.6828	0.996727	-1.02704	2.03784	1.02704
	56	ATHmiR856		33.1626	17.7703	0.998464	32.6508	16.3884	0.998835	1.38183	0.383733	-1.38183		36.202	17.374	0.997	40	21.337	0.957676	-3.96296	15.5945	3.96296		40	20.113	0.654228	40	20.357	0.0648117	-0.244	1.18427	0.244
	57	ATHmiR857		32.8488	17.4564	0.994678	40	23.7376	0.798867	-6.28122	77.7745	6.28122		32.6903	13.8623	0.985	34.3719	15.7089	0.991476	-1.84656	3.59642	1.84656		37.3252	17.4382	0.998294	35.321	15.678	0.99161	1.76019	0.295209	-1.76019
	58	ATHmiR858		36.5243	21.132	0.916349	40	23.7376	0.761631	-2.60567	6.08674	2.60567		33.8547	15.0267	0.999	35.6903	17.0273	0.998724	-2.00068	4.00188	2.00068		34.4988	14.6118	0.998582	35.7222	16.0792	0.99808	-1.46744	2.76531	1.46744
	59	ATHmiR859		40	24.6076	0.450825	37.7357	21.4733	0.964009	3.13429	0.11389	-3.13429		40	21.172	0.979	40	21.337	0.97641	-0.165	1.12117	0.165		40	20.113	0.892782	40	20.357	0.741959	-0.244	1.18427	0.244
	60	ATHmiR860		40	24.6076	0.987126	40	23.7376	0.788195	0.86999	0.547151	-0.86999		40	21.172	0.965	40	21.337	0.996056	-0.165	1.12117	0.165		27.6988	7.8118	0.998188	24.6336	4.99057	0.998209	2.82124	0.141489	-2.82124
	61	ATHmiR861		26.0203	10.6279	0.998643	29.4606	13.1982	0.994142	-2.57034	5.93951	2.57034		29.6381	10.8101	0.998	31.1938	12.5308	0.999539	-1.72071	3.296	1.72071		31.0102	11.1232	0.999967	32.2887	12.6457	0.999737	-1.52245	2.87278	1.52245
	62	ATHmiR862		32.09	16.6977	0.997435	31.6574	15.395	0.995327	1.3026	0.405394	-1.3026		33.8034	14.9754	0.996	35.2556	16.5926	0.993957	-1.61723	3.06785	1.61723		34.7608	14.8738	0.998651	36.2849	16.6419	0.997557	-1.76807	3.40598	1.76807
	63	ATHmiR863		18.6257	3.23333	0.997496	17.8913	1.62892	0.998262	1.60441	0.328869	-1.60441		21.4156	2.58761	0.999	20.9097	2.24674	0.998198	0.340871	0.789564	-0.340871		22.3607	2.4737	0.999363	21.5878	1.94476	0.999496	0.528949	0.693059	-0.528949
	64	ATHmiR864		24.7617	9.36929	0.99842	27.4631	11.2007	0.999655	-1.83146	3.55897	1.83146		26.4998	7.67182	1	31.3222	12.6592	0.99994	-4.98739	31.7215	4.98739		29.1651	9.27812	0.99532	29.8338	10.1908	0.997952	-0.912655	1.88251	0.912655
	65	ATHmiR865		28.9175	13.5251	0.998292	33.9621	17.6997	0.996937	-4.17462	18.0586	4.17462		31.5435	12.7155	1	34.7604	16.0974	0.996015	-3.38191	10.4245	3.38191		34.3452	14.4582	0.997408	37.7602	18.1172	0.998685	-3.65899	12.6318	3.65899
	66	ATHmiR866		35.9878	20.5954	0.995633	40	23.7376	0.872882	-3.14219	8.82866	3.14219		40	21.172	0.947	40	21.337	0.0391996	-0.165	1.12117	0.165		40	20.113	0.924173	40	20.357	0.978381	-0.244	1.18427	0.244
	67	ATHmiR867		40	24.6076	0.453578	40	23.7376	0.921469	0.86999	0.547151	-0.86999		40	21.172	0.958	40	21.337	0.98881	-0.165	1.12117	0.165		40	20.113	0.876233	40	20.357	0.907136	-0.244	1.18427	0.244
	68	ATHmiR868		30.4697	15.0773	0.999024	34.8567	18.5944	0.996792	-3.51709	11.4485	3.51709		34.493	15.665	0.999	39.2828	20.6198	0.98747	-4.95482	31.0133	4.95482		35.6972	15.8102	0.997588	34.5343	14.8913	0.999228	0.918874	0.528922	-0.918874
	69	ATHmiR869		30.5914	15.199	0.998429	36.3299	20.0675	0.963861	-4.8685	29.2123	4.8685		39.0584	20.2304	0.999	33.8472	15.1842	0.999796	5.04624	0.0302643	-5.04624		34.6862	14.7992	0.999634	35.0973	15.4543	0.999229	-0.655064	1.57469	0.655064
	70	ATHmiR870		27.6987	12.3064	0.999685	40	23.7376	0.670145	-11.4313	2761.57	11.4313		29.6853	10.8573	0.999	40	21.337	0.738153	-10.4797	1427.89	10.4797		32.2717	12.3847	0.998576	40	20.357	0.966061	-7.97226	251.124	7.97226

## Sheet: C. HYL1-dependent miRNAs
	Table S2 C. Selected HYL1-depedent pri-miRNAs.
	No.	miRNA		I biological replica										II biological replica										III biological replica
				hyl1			WT			hyl1 vs wt				hyl1			WT			hyl1 vs wt				hyl1			WT			hyl1 vs wt
				Ct hyl1	ΔCt hyl1	R2 hyl1	Ct wt	ΔCt wt	R2 wt	ΔΔCt	2^-ΔΔCt	log		Ct hyl1	ΔCt hyl1	R2 hyl1	Ct wt	ΔCt wt	R2 wt	ΔΔCt	2^-ΔΔCt	log		Ct hyl1	ΔCt hyl1	R2 hyl1	Ct wt	ΔCt wt	R2 wt	ΔΔCt	2^-ΔΔCt	log
	1	ATHmiR156a		35.942	15.8494	0.99945	39.1595	19.3743	0.999649	-3.52485	11.5103	3.52485		32.6481	13.0538	0.99967	35.62	16.1085	0.998751	-3.05478	8.30961	3.05478		29.9779	11.1499	0.998	40	21.337	0.79865	-10.1871	1165.76	10.1871
	2	ATHmiR156c		29.2649	9.17237	0.999642	36.3497	16.5644	0.999937	-7.39206	167.97	7.39206		26.9586	7.36426	0.999992	32.9107	13.3992	0.999626	-6.03494	65.569	6.03494		26.3327	7.5047	1	31.723	13.06	0.999133	-5.55532	47.0238	5.55532
	3	ATHmiR157a		32.633	12.5405	0.997128	35.9205	16.1352	0.999572	-3.59479	12.082	3.59479		29.8503	10.256	0.999304	32.8018	13.2903	0.999626	-3.03437	8.19288	3.03437		29.9043	11.0763	0.999	32.3584	13.6954	0.999869	-2.61912	6.14373	2.61912
	4	ATHmiR157c		25.5703	5.4777	0.998586	29.7394	9.95417	0.99941	-4.47647	22.2613	4.47647		23.7313	4.13694	0.99827	27.357	7.84553	0.999348	-3.7086	13.0737	3.7086		L	L	L	L	L	L	L	L	L
	5	ATHmiR158a		28.1064	8.01384	0.999328	31.909	12.1237	0.999886	-4.10986	17.2659	4.10986		26.3246	6.73027	0.999528	29.9621	10.4507	0.999645	-3.72039	13.181	3.72039		25.8661	7.03809	1	29.7734	11.1104	0.99923	-4.07229	16.8222	4.07229
	6	ATHmiR159a		27.0241	6.93158	0.999698	31.5793	11.794	0.999909	-4.86242	29.0894	4.86242		25.3247	5.73039	0.999906	30.7692	11.2577	0.999928	-5.52731	46.1196	5.52731		27.0867	8.25869	0.999	33.2803	14.6173	0.998311	-6.35858	82.0585	6.35858
	7	ATHmiR159b		26.9222	6.82966	0.99843	29.905	10.1198	0.999765	-3.29012	9.78197	3.29012		25.5353	5.94098	0.999487	30.2244	10.7129	0.944483	-4.77195	27.3212	4.77195		26.5735	7.74551	1	29.4468	10.7838	0.999846	-3.03825	8.21492	3.03825
	8	ATHmiR160a		30.5101	10.4176	0.999229	35.1796	15.3943	0.99967	-4.97678	31.4891	4.97678		28.6132	9.01887	0.999312	34.4577	14.9462	0.999504	-5.92737	60.858	5.92737		28.2283	9.40032	0.999	32.7097	14.0467	0.999977	-4.6464	25.0441	4.6464
	9	ATHmiR160b		30.3997	10.3071	0.999424	32.5765	12.7912	0.99998	-2.48405	5.59468	2.48405		27.8373	8.24295	0.999891	31.1266	11.6151	0.999635	-3.37214	10.3542	3.37214		30.4418	11.6138	1	33.4324	14.7694	0.996029	-3.15558	8.91095	3.15558
	10	ATHmiR160c		26.9786	6.88604	0.999007	31.3433	11.5581	0.999916	-4.67203	25.493	4.67203		25.6778	6.08346	0.999672	30.2665	10.755	0.997953	-4.67159	25.4853	4.67159		27.5054	8.6774	0.998	31.8337	13.1707	0.998048	-4.49327	22.5221	4.49327
	11	ATHmiR161		28.0601	7.96756	0.999973	33.2365	13.4512	0.999593	-5.48366	44.7453	5.48366		26.2181	6.62379	0.999986	31.4375	11.926	0.999929	-5.30225	39.4582	5.30225		26.0163	7.18829	1	33.1889	14.5259	0.999106	-7.33757	161.744	7.33757
	12	ATHmiR163		27.202	7.10946	0.99973	30.4736	10.6883	0.999985	-3.57883	11.9491	3.57883		26.254	6.65962	0.999933	29.4129	9.90143	0.999879	-3.24182	9.45985	3.24182		25.2136	6.38558	1	26.0557	7.39268	0.998019	-1.00709	2.00986	1.00709
	13	ATHmiR164b		31.064	10.9714	0.99849	35.0981	15.3129	0.999942	-4.34148	20.2728	4.34148		27.0143	7.41999	0.999288	33.7408	14.2293	0.997201	-6.80936	112.156	6.80936		28.468	9.64001	0.998	32.7527	14.0897	0.998168	-4.4497	21.8522	4.4497
	14	ATHmiR164c		29.0925	8.99998	0.99971	32.7393	12.954	0.999778	-3.95405	15.4984	3.95405		26.5721	6.9778	0.999772	30.3625	10.851	0.999267	-3.87324	14.6541	3.87324		29.656	10.828	1	32.7703	14.1073	0.999763	-3.2793	9.70885	3.2793
	15	ATHmiR165a		28.7257	8.63313	0.999928	33.7457	13.9605	0.999888	-5.32735	40.1505	5.32735		26.3198	6.72546	0.999764	31.9899	12.4784	0.997623	-5.75293	53.9267	5.75293		25.9278	7.09981	1	31.7764	13.1134	0.998889	-6.01355	64.604	6.01355
	16	ATHmiR165b		33.8335	13.741	0.999398	36.2268	16.4415	0.999952	-2.70053	6.50042	2.70053		29.955	10.3607	0.999538	34.0254	14.514	0.999762	-4.15331	17.7939	4.15331		31.9632	13.1352	0.999	40	21.337	0.961174	-8.20185	294.443	8.20185
	17	ATHmiR166a		25.1984	5.10586	0.999644	31.2383	11.453	0.999945	-6.34715	81.4111	6.34715		23.5175	3.92314	0.999946	30.1977	10.6862	0.999607	-6.76311	108.617	6.76311		23.6485	4.82054	0.999	30.5364	11.8734	0.999609	-7.05288	132.778	7.05288
	18	ATHmiR166b		28.1278	8.03524	0.997928	34.7602	14.975	0.997171	-6.93972	122.762	6.93972		25.9876	6.39328	0.999687	33.2677	13.7562	0.999996	-7.36294	164.614	7.36294		26.5075	7.67945	0.993	32.6421	13.9791	0.996251	-6.29966	78.7745	6.29966
	19	ATHmiR166e		29.5971	9.50452	0.997221	32.2099	12.4246	0.999075	-2.92011	7.56904	2.92011		26.7749	7.18058	0.999897	31.4176	11.9062	0.999885	-4.72559	26.4572	4.72559		29.8515	11.0235	0.999	31.3208	12.6578	0.997211	-1.63426	3.10429	1.63426
	20	ATHmiR167a		25.0819	4.98934	0.999112	28.9235	9.13821	0.99987	-4.14887	17.7392	4.14887		22.8305	3.23613	0.998805	27.6317	8.12024	0.999219	-4.8841	29.5298	4.8841		23.8472	5.01918	0.998	24.0698	5.40679	0.998823	-0.387608	1.30822	0.387608
	21	ATHmiR167c		36.1905	16.0979	0.999783	40	20.2147	0.985874	-4.11683	17.3496	4.11683		33.248	13.6537	0.999963	35.9903	16.4788	0.999765	-2.82516	7.0869	2.82516		33.5853	14.7573	0.999	37.5857	18.9227	0.998444	-4.16536	17.9432	4.16536
	22	ATHmiR168a		25.3217	5.22918	0.999607	29.9176	10.1323	0.999951	-4.90316	29.9226	4.90316		23.9524	4.35806	0.999613	28.6311	9.11966	0.999853	-4.76159	27.1258	4.76159		24.8101	5.98211	1	28.4893	9.8263	0.998979	-3.84419	14.3621	3.84419
	23	ATHmiR168b		29.9373	9.84473	0.9995	33.6102	13.8249	0.999718	-3.98017	15.7816	3.98017		29.0283	9.43395	0.999723	32.7983	13.2868	0.99989	-3.85284	14.4484	3.85284		28.9473	10.1193	0.998	32.3692	13.7062	0.985337	-3.58685	12.0157	3.58685
	24	ATHmiR169a		27.9311	7.83856	0.998753	32.1756	12.3903	0.999959	-4.55174	23.4536	4.55174		25.2292	5.63482	0.999224	30.2609	10.7494	0.999779	-5.1146	34.6455	5.1146		27.2471	8.41907	1	31.3641	12.7011	0.999609	-4.28204	19.4546	4.28204
	25	ATHmiR169f		29.1951	9.10251	0.999531	34.563	14.7777	0.999986	-5.67517	51.0972	5.67517		29.4395	9.8452	0.999734	32.7113	13.1998	0.999197	-3.35459	10.229	3.35459		29.5644	10.7364	0.999	33.7146	15.0516	0.999816	-4.31514	19.9061	4.31514
	26	ATHmiR169h		29.3295	9.23692	0.999856	32.7622	12.9769	0.999899	-3.73999	13.3614	3.73999		27.497	7.9027	0.999622	32.5724	13.0609	0.998267	-5.15824	35.7097	5.15824		27.519	8.69103	0.998	31.679	13.016	0.999774	-4.32492	20.0415	4.32492
	27	ATHmiR169l		28.3054	8.2128	0.995159	29.3422	9.55692	0.999302	-1.34412	2.53876	1.34412		25.9576	6.36323	0.998715	28.6011	9.08963	0.999434	-2.7264	6.61803	2.7264		25.6971	6.8691	1	28.3241	9.66109	0.999276	-2.79199	6.92586	2.79199
	28	ATHmiR171b		27.372	7.27946	0.999848	31.8795	12.0942	0.999601	-4.81474	28.1437	4.81474		24.6486	5.05429	0.999741	29.4391	9.92762	0.999692	-4.87333	29.3102	4.87333		24.2357	5.40774	0.997	28.7927	10.1297	0.998334	-4.72195	26.3905	4.72195
	29	ATHmiR171c		25.8408	5.74828	0.999568	32.47	12.6847	0.999468	-6.93642	122.482	6.93642		23.3256	3.73123	0.999414	29.4521	9.94065	0.999795	-6.20942	73.9984	6.20942		24.4266	5.59865	1	29.9064	11.2434	0.998809	-5.64476	50.0314	5.64476
	30	ATHmiR172a		27.7164	7.62388	0.999847	33.3985	13.6133	0.999706	-5.98938	63.5308	5.98938		25.332	5.73764	0.999733	31.5131	12.0016	0.999598	-6.26395	76.8485	6.26395		24.1551	5.3271	0.998	28.7951	10.1321	0.998819	-4.80504	27.9552	4.80504
	31	ATHmiR172b		22.537	2.44444	0.999622	29.5147	9.72947	0.99995	-7.28503	155.96	7.28503		20.8141	1.21977	0.9993	27.4469	7.93544	0.999346	-6.71567	105.104	6.71567		22.7245	3.89645	0.998	28.5313	9.8683	0.999355	-5.97185	62.7634	5.97185
	32	ATHmiR172e		32.3217	12.2292	0.999087	36.7612	16.9759	0.999981	-4.74673	26.8478	4.74673		31.2452	11.6508	0.999433	34.0665	14.555	0.999685	-2.90415	7.48579	2.90415		33.2863	14.4583	1	40	21.337	0.939624	-6.87872	117.68	6.87872
	33	ATHmiR319b		31.7544	11.6619	0.999488	34.9855	15.2002	0.999729	-3.53833	11.6183	3.53833		29.5893	9.99497	0.998736	33.33	13.8185	0.999677	-3.82355	14.1581	3.82355		30.6413	11.8133	1	33.3165	14.6535	0.999239	-2.84025	7.16145	2.84025
	34	ATHmiR390b		25.7111	10.3187	0.99953	36.5046	20.2422	0.985128	-9.92345	971.079	9.92345		28.6137	9.78566	1	37.6454	18.9824	0.996091	-9.19671	586.796	9.19671		30.3136	10.4266	0.99976	36.6294	16.9864	0.997347	-6.55984	94.3427	6.55984
	35	ATHmiR393a		30.9366	10.8441	0.999227	33.125	13.3398	0.999224	-2.49571	5.64007	2.49571		30.8904	11.296	0.999975	33.6952	14.1837	0.999902	-2.8877	7.40091	2.8877		30.4182	11.5902	0.999	33.9487	15.2857	0.99973	-3.69552	12.9558	3.69552
	36	ATHmiR393b		31.6739	11.5814	0.998789	36.7081	16.9228	0.99994	-5.34145	40.5448	5.34145		27.7318	8.13746	0.999993	33.8578	14.3463	0.99924	-6.20886	73.9695	6.20886		26.2628	7.43483	0.999	32.2791	13.6161	0.999791	-6.18124	72.5671	6.18124
	37	ATHmiR395a		28.4766	8.38405	0.999566	34.2217	14.4364	0.999046	-6.05238	66.3663	6.05238		31.7612	12.1668	0.99992	33.0113	13.4998	0.999393	-1.33301	2.51928	1.33301		29.3855	10.5575	1	31.6317	12.9687	0.998559	-2.41115	5.31898	2.41115
	38	ATHmiR395b		27.7236	7.63105	0.999806	31.051	11.2657	0.999977	-3.63467	12.4207	3.63467		29.963	10.3687	0.999364	33.7987	14.2872	0.999865	-3.91851	15.1213	3.91851		29.2559	10.4279	1	30.217	11.554	0.998599	-1.12604	2.1826	1.12604
	39	ATHmiR395c		27.8655	7.77291	0.999615	32.3962	12.6109	0.999994	-4.83802	28.6016	4.83802		29.9759	10.3816	0.999743	33.3009	13.7894	0.999883	-3.40783	10.6135	3.40783		29.7093	10.8813	1	31.5374	12.8744	0.999549	-1.99306	3.9808	1.99306
	40	ATHmiR395f		32.017	11.9244	0.999308	34.5308	14.7455	0.999341	-2.82111	7.06704	2.82111		32.3319	12.7376	0.999415	34.864	15.3525	0.998034	-2.61494	6.12599	2.61494		31.0254	12.1974	0.999	34.5428	15.8798	0.999335	-3.68242	12.8386	3.68242
	41	ATHmiR396b		28.0092	7.91662	0.999587	33.6954	13.9101	0.999775	-5.99352	63.7132	5.99352		25.0884	5.49408	0.999331	31.8611	12.3497	0.986545	-6.85557	115.806	6.85557		25.868	7.03996	0.998	30.5727	11.9097	0.998864	-4.86977	29.238	4.86977
	42	ATHmiR397a		31.2472	11.1547	0.999856	34.0524	14.2672	0.999911	-3.11252	8.64894	3.11252		30.2108	10.6164	0.999882	33.2908	13.7793	0.999863	-3.16283	8.95587	3.16283		29.2419	10.4139	1	32.76	14.097	0.998449	-3.68317	12.8453	3.68317
	43	ATHmiR398b		23.4732	3.38067	0.999602	27.3834	7.5981	0.999562	-4.21743	18.6025	4.21743		22.0494	2.45504	0.998149	27.0316	7.52009	0.99978	-5.06505	33.4759	5.06505		22.2426	3.41456	1	24.4277	5.76471	0.999551	-2.35015	5.09879	2.35015
	44	ATHmiR398c		24.9424	4.8498	0.99976	29.2274	9.44216	0.999656	-4.59236	24.1234	4.59236		23.2696	3.6753	0.999862	28.877	9.36548	0.998911	-5.69018	51.6316	5.69018		22.624	3.79601	1	25.1176	6.45457	0.999618	-2.65856	6.31404	2.65856
	45	ATHmiR399a		31.8127	11.7201	0.99975	34.0274	14.2421	0.999949	-2.52197	5.74365	2.52197		30.1545	10.5602	0.999778	34.1902	14.6788	0.995721	-4.11857	17.3706	4.11857		34.8979	16.0699	1	40	21.337	0.198916	-5.26713	38.5093	5.26713
	46	ATHmiR399b		34.5415	14.449	0.999233	38.0793	18.294	0.999642	-3.84505	14.3706	3.84505		31.4686	11.8742	0.999483	35.989	16.4775	0.997064	-4.60329	24.3068	4.60329		31.7535	12.9255	1	36.5849	17.9219	0.99997	-4.99638	31.9199	4.99638
	47	ATHmiR399c		27.083	6.99043	0.999934	30.7793	10.994	0.999754	-4.00355	16.0395	4.00355		27.3797	7.78539	0.997892	30.9313	11.4198	0.999176	-3.63442	12.4185	3.63442		30.1336	11.3056	0.999	32.9526	14.2896	0.998733	-2.98405	7.91203	2.98405
	48	ATHmiR399d		32.3303	12.2378	0.999535	34.5928	14.8075	0.999455	-2.56977	5.93714	2.56977		30.3182	10.7238	0.999734	36.1857	16.6743	0.999546	-5.95045	61.839	5.95045		34.4464	15.6184	0.998	40	21.337	0.989368	-5.71857	52.6576	5.71857
	49	ATHmiR400		31.1145	11.022	0.999295	32.9297	13.1444	0.999967	-2.12248	4.35441	2.12248		29.7685	10.1742	0.999945	35.8333	16.3218	0.999862	-6.14766	70.8973	6.14766		29.348	10.52	1	33.8872	15.2242	0.998835	-4.70423	26.0684	4.70423
	50	ATHmiR402		30.8907	10.7982	0.999661	31.7207	11.9354	0.99959	-1.13725	2.19961	1.13725		29.6502	10.0558	0.999408	33.5534	14.0419	0.99999	-3.98608	15.8463	3.98608		29.8532	11.0252	1	32.536	13.873	0.999797	-2.84774	7.19873	2.84774
	51	ATHmiR403		26.6174	6.52479	0.99974	30.3793	10.5941	0.998306	-4.06928	16.7871	4.06928		25.2935	5.69911	0.998558	29.1122	9.60077	0.999217	-3.90166	14.9457	3.90166		25.0993	6.27129	1	27.9792	9.31624	0.997927	-3.04495	8.25319	3.04495
	52	ATHmiR775		24.4169	9.02449	0.999841	27.6926	11.4303	0.998338	-2.40578	5.29921	2.40578		28.1451	9.31706	0.999	30.8437	12.1807	0.995717	-2.86362	7.2784	2.86362		29.0254	9.13838	0.997833	31.7046	12.0616	0.995319	-2.92325	7.58552	2.92325
	53	ATHmiR779		21.7419	6.34951	0.999936	26.9428	10.6804	0.998972	-4.33094	20.1253	4.33094		26.4215	7.59353	0.997	29.6644	11.0014	0.999866	-3.40787	10.6138	3.40787		26.7357	6.84875	0.999249	31.0731	11.4301	0.999016	-4.58136	23.9402	4.58136
	54	ATHmiR823		28.3067	12.9143	0.998949	37.5772	21.3148	0.995576	-8.4005	337.911	8.4005		31.2717	12.4437	1	33.5222	14.8592	0.999194	-2.41547	5.33492	2.41547		32.9119	13.0249	0.999617	36.2165	16.5735	0.997905	-3.54869	11.702	3.54869
	55	ATHmiR824		23.4581	8.06576	0.999168	27.3516	11.0893	0.999048	-3.0235	8.13136	3.0235		27.3227	8.49472	0.998	29.682	11.019	0.998394	-2.52431	5.75298	2.52431		28.2737	8.38671	0.999697	30.9741	11.3311	0.99869	-2.94442	7.69763	2.94442
	56	ATHmiR827		25.8605	10.4681	0.996684	28.7807	12.5183	0.994337	-2.05024	4.14175	2.05024		29.1647	10.3367	0.999	31.4347	12.7717	0.99984	-2.43497	5.40754	2.43497		29.0611	9.1741	0.997926	33.3665	13.7235	0.998596	-4.5494	23.4156	4.5494
	57	ATHmiR865		28.9175	13.5251	0.998292	33.9621	17.6997	0.996937	-4.17462	18.0586	4.17462		31.5435	12.7155	1	34.7604	16.0974	0.996015	-3.38191	10.4245	3.38191		34.3452	14.4582	0.997408	37.7602	18.1172	0.998685	-3.65899	12.6318	3.65899
	Criteria of selection
	In two out of three biological replica of the experiment:
	1.miRNA precursor was detected.
	2.Logarythm of the fold change value was equal or higher than 2,322 OR was equal or lower than -2,322.
	3.R-square value was equal or higher than 0,995.
	Note than some of the analysed pri-miRNAs do not meet all these criteria, though they are accumulated on a very high level in hyl1mutant.
	They are not listed above, however they also seem to be strongly HYL1-dependent.
	Abbreviations:
	L- lack of data

## Sheet: D. Analyzed miRNA families
	Table S2 D. Selected HYL1-depedent pri-miRNAs.
	No.	miRNA family	No. of analyzed family members	No. of selected HYL1-dependent miRNAs	Selected HYL1-dependent miRNAs
	1.	miR156/157	12	4	156a, 156c, 157a, 157c
	2.	miR158	2	1	158a
	3.	miR159/319	6	3	159a, 159b, 319b
	4.	miR160	3	3	160a, 160b, 160c
	5.	miR161	1	1	161
	6.	miR162	2	0	-
	7.	miR163	1	1	163
	8.	miR164	3	2	164b, 164c
	9.	miR165/166	9	5	165a, 165b, 166a, 166b, 166e
	10.	miR167	4	2	167a, 167c
	11.	miR168	2	2	168a, 168b
	12.	miR169	14	4	169a, 169f, 169h, 169l
	13.	miR170/171	4	2	171b, 171c
	14.	miR172	5	3	172a, 172b, 172e
	15.	miR173	1	0	-
	16.	miR390	2	1	390b
	17.	miR391	1	0	-
	18.	miR393	2	2	393a, 393b
	19.	miR394	2	0	-
	20.	miR395	6	4	395a, 395b, 395c, 395f
	21.	miR396	2	1	396b
	22.	miR397	2	1	397a
	23.	miR398	3	2	398b, 398c
	24.	miR399	6	4	399a, 399b, 399c, 399d
	25.	miR400	1	1	400
	26.	miR401	1	0	-
	27.	miR402	1	1	402
	28.	miR403	1	1	403
	29.	miR404	1	0	-
	30.	miR405	0	0	-
	31.	miR406	0	0	-
	32.	miR407	1	0	-
	33.	miR408	1	0	-
	34.	miR413	1	0	-
	35.	miR414	1	0	-
	36.	miR415	1	0	-
	37.	miR416	0	0	-
	38.	miR417	1	0	-
	39.	miR418	1	0	-
	40.	miR419	1	0	-
	41.	miR420	1	0	-
	42.	miR426	0	0	-
	43.	miR447	3	0	-
	44.	miR472	1	0	-
	45.	miR771	1	0	-
	46.	miR773	1	0	-
	47.	miR774	1	0	-
	48.	miR775	1	1	775
	49.	miR776	1	0	-
	50.	miR777	1	0	-
	51.	miR778	1	0	-
	52.	miR779	1	1	779
	53.	miR780	1	0	-
	54.	miR781	1	0	-
	55.	miR782	1	0	-
	56.	miR783	1	0	-
	57.	miR822	1	0	-
	58.	miR823	1	1	823
	59.	miR824	1	1	824
	60.	miR825	1	0	-
	61.	miR826	1	0	-
	62.	miR827	1	1	827
	63.	miR828	1	0	-
	64.	miR829	1	0	-
	65.	miR830	1	0	-
	66.	miR831	1	0	-
	67.	miR832	1	0	-
	68.	miR833	1	0	-
	69.	miR834	1	0	-
	70.	miR835	1	0	-
	71.	miR836	1	0	-
	72.	miR837	1	0	-
	73.	miR838	1	0	-
	74.	miR839	1	0	-
	75.	miR840	1	0	-
	76.	miR841	1	0	-
	77.	miR842	1	0	-
	78.	miR843	1	0	-
	79.	miR844	1	0	-
	80.	miR845	2	0	-
	81.	miR846	1	0	-
	82.	miR847	1	0	-
	83.	miR848	1	0	-
	84.	miR849	1	0	-
	85.	miR850	1	0	-
	86.	miR851	1	0	-
	87.	miR852	1	0	-
	88.	miR853	1	0	-
	89.	miR854	2	0	-
	90.	miR855	1	0	-
	91.	miR856	1	0	-
	92.	miR857	1	0	-
	93.	miR858	1	0	-
	94.	miR859	1	0	-
	95.	miR860	1	0	-
	96.	miR861	1	0	-
	97.	miR862	1	0	-
	98.	miR863	1	0	-
	99.	miR864	1	0	-
	100.	miR865	1	1	865
	101.	miR866	1	0	-
	102.	miR867	1	0	-
	103.	miR868	1	0	-
	104.	miR869	1	0	-
	105.	miR870	1	0	-
	106.	miR1886	0	0	-
	107.	miR1887	0	0	-
	108.	miR1888	0	0	-
			176	57
		Criteria of selection
		In two out of three biological replica of the experiment:
		1.miRNA precursor was detected.
		2.Logarythm of the fold change value was equal or higher than 2,322 OR was equal or lower than -2,322.
		3.R-square value was equal or higher than 0,995.
		Note than some of the analysed pri-miRNAs do not meet all these criteria, though they are accumulated on a very high level in hyl1mutant.
		They are not listed above, however they also seem to be strongly HYL1-dependent.
	Legend
		A. thaliana miRNA families containing selected HYL1-dependent miRNAs
		A. thaliana miRNA families not analyzed
